# Supplementary material
Source: PubMed Central journal article supplement (PMC5877972)
Supplement: pnas.1715713115.sapp.pdf [file pnas.1715713115.sapp.pdf]

## **Supplementary Information**

### **The secreted metabolome of *Streptomyces chartreusis* and implications for bacterial chemistry**

Christoph H. R. Senges<sup>1</sup>, Arwa Al-Dilaimi<sup>2</sup>, Douglas H. Marchbank<sup>3</sup>, Daniel Wibberg<sup>2</sup>, Anika Winkler<sup>2</sup>, Brad Haltli<sup>3</sup>, Minou Nowrousian<sup>4</sup>, Jörn Kalinowski<sup>2</sup>, Russell G. Kerr<sup>3</sup>, Julia E. Bandow<sup>1\*</sup>

<sup>1</sup> Applied Microbiology, Ruhr University Bochum, 44780 Bochum, Germany

<sup>2</sup> Center for Biotechnology, Bielefeld University, 33594 Bielefeld, Germany

<sup>3</sup> Department of Chemistry, University of Prince Edward Island, Charlottetown, PE, C1A 4P3, Canada

<sup>4</sup> Department of General and Molecular Botany, Ruhr University Bochum, 44780 Bochum, Germany

#### **Content**

**Supplementary tables S1 – S5**

**Supplementary figures S1 - S25**

**Methods**

**References**

## Supplementary tables

**Tab. S1 Genome summary.** Summary of information on the genome of *S. chartreusis* NRRL 3882.

|                                    |              |
|------------------------------------|--------------|
| length                             | 8,983,317 bp |
| GC content                         | 71.23%       |
| <hr/>                              |              |
| annotated genes                    | 7,940        |
| tRNAs                              | 79           |
| rRNAs                              | 18           |
| <hr/>                              |              |
| in predicted biosynthesis clusters | 3,060,457 bp |
|                                    | 34.07%       |

**Table S2: Biosynthesis cluster information.** Summary of the antiSMASH biosynthesis cluster prediction for the genome of *S. chartreusis* NRRL 3882. Clusters for which products were found are marked in red. (page 1 of 6)

| Cluster | Type                     | From    | To      | Most similar known cluster                                                   | MIBiG BGC-ID  |
|---------|--------------------------|---------|---------|------------------------------------------------------------------------------|---------------|
| 1       | Cf_putative              | 23240   | 40560   | A54145_biosynthetic_gene_cluster (3% of genes show similarity)               | BGC0000291_c1 |
| 2       | Cf_putative              | 173240  | 186023  | A54145_biosynthetic_gene_cluster (3% of genes show similarity)               | BGC0000291_c1 |
| 3       | Cf_putative              | 192600  | 210884  | -                                                                            | -             |
| 4       | Lasso peptide            | 213513  | 236317  | Alnumycin_biosynthetic_gene_cluster (6% of genes show similarity)            | BGC0000195_c1 |
| 5       | Cf_saccharide            | 332803  | 358039  | -                                                                            | -             |
| 6       | Cf_putative              | 405285  | 422485  | -                                                                            | -             |
| 7       | Cf_putative              | 422567  | 445607  | -                                                                            | -             |
| 8       | Melanin                  | 496290  | 506901  | Melanin_biosynthetic_gene_cluster (42% of genes show similarity)             | BGC0000908_c1 |
| 9       | Cf_putative              | 576501  | 594899  | -                                                                            | -             |
| 10      | Cf_putative              | 599891  | 606325  | -                                                                            | -             |
| 11      | Cf_putative              | 726024  | 747072  | -                                                                            | -             |
| 12      | T1pks                    | 834590  | 882893  | Lobophorin_biosynthetic_gene_cluster (6% of genes show similarity)           | BGC0001183_c1 |
| 13      | Cf_saccharide            | 929133  | 977696  | Tallysomycin_biosynthetic_gene_cluster (5% of genes show similarity)         | BGC0001048_c1 |
| 14      | Cf_saccharide            | 999313  | 1036687 | Tetronasin_biosynthetic_gene_cluster (3% of genes show similarity)           | BGC0000163_c1 |
| 15      | T3pks-Nrps               | 1021374 | 1094818 | <b>Coelichelin_biosynthetic_gene_cluster (100% of genes show similarity)</b> | BGC0000325_c1 |
| 16      | Cf_putative              | 1122096 | 1129289 | -                                                                            | -             |
| 17      | Cf_saccharide            | 1132834 | 1168661 | Meilingmycin_biosynthetic_gene_cluster (2% of genes show similarity)         | BGC0000093_c1 |
| 18      | Terpene-Cf_saccharide    | 1205879 | 1236826 | Hopene_biosynthetic_gene_cluster (92% of genes show similarity)              | BGC0000663_c1 |
| 19      | Cf_putative              | 1254051 | 1260700 | -                                                                            | -             |
| 20      | Cf_putative              | 1287320 | 1305082 | GE81112_biosynthetic_gene_cluster (14% of genes show similarity)             | BGC0000360_c1 |
| 21      | Cf_saccharide            | 1374082 | 1400540 | Sch47554_/_Sch47555_biosynthetic_gene_cluster (10% of genes show similarity) | BGC0000268_c1 |
| 22      | T2pks                    | 1407588 | 1450343 | Granaticin_biosynthetic_gene_cluster (27% of genes show similarity)          | BGC0000227_c1 |
| 23      | Cf_saccharide-Amglyccycl | 1421015 | 1475661 | Granaticin_biosynthetic_gene_cluster (27% of genes show similarity)          | BGC0000227_c1 |
| 24      | Cf_fatty_acid            | 1492827 | 1513807 | -                                                                            | -             |
| 25      | Cf_putative              | 1550732 | 1567450 | -                                                                            | -             |

**Table S2: Biosynthesis cluster information.** Summary of the antiSMASH biosynthesis cluster prediction for the genome of *S. chartreusis* NRRL 3882. Clusters for which products were found are marked in red. (page 2 of 6)

| Cluster | Type                                | From    | To      | Most similar known cluster                                                  | MIBiG BGC-ID  |
|---------|-------------------------------------|---------|---------|-----------------------------------------------------------------------------|---------------|
| 26      | Cf_putative                         | 1605165 | 1619242 | Kanamycin_biosynthetic_gene_cluster (15% of genes show similarity)          | BGC0000704_c1 |
| 27      | Cf_putative                         | 1700448 | 1714088 | Lipomycin_biosynthetic_gene_cluster (9% of genes show similarity)           | BGC0001003_c1 |
| 28      | Siderophore                         | 1736990 | 1752570 | -                                                                           | -             |
| 29      | Other                               | 1756539 | 1797297 | Meilingmycin_biosynthetic_gene_cluster (3% of genes show similarity)        | BGC0000093_c1 |
| 30      | Cf_saccharide                       | 1817459 | 1847309 | -                                                                           | -             |
| 31      | Terpene                             | 1990654 | 2012816 | -                                                                           | -             |
| 32      | Bacteriocin                         | 2073611 | 2097275 | Enduracidin_biosynthetic_gene_cluster (4% of genes show similarity)         | BGC0000341_c1 |
| 33      | Cf_saccharide                       | 2102364 | 2124664 | Enduracidin_biosynthetic_gene_cluster (14% of genes show similarity)        | BGC0000341_c1 |
| 34      | Cf_putative                         | 2170905 | 2210925 | JBIR-34,_JBIR-35_biosynthetic_gene_cluster (12% of genes show similarity)   | BGC0000376_c1 |
| 35      | Cf_saccharide                       | 2232701 | 2285215 | -                                                                           | -             |
| 36      | Siderophore                         | 2359453 | 2371666 | -                                                                           | -             |
| 37      | Cf_saccharide                       | 2626814 | 2648124 | Frankiamycin_biosynthetic_gene_cluster (21% of genes show similarity)       | BGC0001197_c1 |
| 38      | Cf_putative                         | 2681544 | 2693681 | -                                                                           | -             |
| 39      | T1pks-Cf_fatty_acid - Butyrolactone | 2727323 | 2782452 | Stambomycin_biosynthetic_gene_cluster (16% of genes show similarity)        | BGC0000151_c1 |
| 40      | T2pks                               | 2814298 | 2856813 | Spore_pigment_biosynthetic_gene_cluster (75% of genes show similarity)      | BGC0000271_c1 |
| 41      | Cf_putative                         | 2994518 | 3003271 | Echosides_biosynthetic_gene_cluster (35% of genes show similarity)          | BGC0000340_c1 |
| 42      | Terpene                             | 3038256 | 3059341 | Albaflavenone_biosynthetic_gene_cluster (100% of genes show similarity)     | BGC0000660_c1 |
| 43      | Cf_saccharide                       | 3102118 | 3123869 | -                                                                           | -             |
| 44      | Cf_putative                         | 3154745 | 3174277 | -                                                                           | -             |
| 45      | Nucleoside-Cf_saccharide            | 3257787 | 3282146 | <b>Tunicamycin_biosynthetic_gene_cluster (85% of genes show similarity)</b> | BGC0000880_c1 |
| 46      | Cf_saccharide                       | 3316387 | 3340512 | Cypemycin_biosynthetic_gene_cluster (22% of genes show similarity)          | BGC0000582_c1 |
| 47      | Cf_putative                         | 3349881 | 3356835 | -                                                                           | -             |
| 48      | Cf_saccharide                       | 3403022 | 3425505 | -                                                                           | -             |
| 49      | Cf_putative                         | 3455602 | 3474041 | -                                                                           | -             |
| 50      | Cf_putative                         | 3536975 | 3565666 | -                                                                           | -             |

**Table S2: Biosynthesis cluster information.** Summary of the antiSMASH biosynthesis cluster prediction for the genome of *S. chartreusis* NRRL 3882. Clusters for which products were found are marked in red. (page 3 of 6)

| Cluster | Type                     | From    | To      | Most similar known cluster                                                           | MIBiG BGC-ID  |
|---------|--------------------------|---------|---------|--------------------------------------------------------------------------------------|---------------|
| 51      | Cf_saccharide            | 3707184 | 3728491 | -                                                                                    | -             |
| 52      | Cf_saccharide            | 3751708 | 3773918 | -                                                                                    | -             |
| 53      | Cf_saccharide            | 3781103 | 3803034 | -                                                                                    | -             |
| 54      | Nrps                     | 3808020 | 3850002 | -                                                                                    | -             |
| 55      | Cf_putative              | 3889468 | 3910342 | -                                                                                    | -             |
| 56      | Cf_saccharide            | 4009221 | 4030114 | Gilvocarcin_biosynthetic_gene_cluster (7% of genes show similarity)                  | BGC0000226_c1 |
| 57      | Cf_saccharide            | 4229097 | 4249753 | -                                                                                    | -             |
| 58      | Cf_saccharide            | 4298337 | 4323559 | Zorbamycin_biosynthetic_gene_cluster (8% of genes show similarity)                   | BGC0001058_c1 |
| 59      | Cf_saccharide            | 4349243 | 4388463 | A54145_biosynthetic_gene_cluster (5% of genes show similarity)                       | BGC0000291_c1 |
| 60      | Butyrolactone            | 4497002 | 4508054 | Griseoviridin/_viridogrisein_biosynthetic_gene_cluster (8% of genes show similarity) | BGC0000459_c1 |
| 61      | Cf_putative              | 4631705 | 4647088 | -                                                                                    | -             |
| 62      | Cf_saccharide            | 4662330 | 4683289 | -                                                                                    | -             |
| 63      | Cf_saccharide            | 4692936 | 4714660 | Clavulanic_acid_biosynthetic_gene_cluster (8% of genes show similarity)              | BGC0000845_c1 |
| 64      | Cf_saccharide            | 4899873 | 4921294 | -                                                                                    | -             |
| 65      | Cf_putative              | 4933100 | 4940465 | -                                                                                    | -             |
| 66      | Cf_saccharide            | 4946700 | 4967644 | -                                                                                    | -             |
| 67      | Cf_putative              | 4999656 | 5029511 | Kosinostatin_biosynthetic_gene_cluster (4% of genes show similarity)                 | BGC0001073_c1 |
| 68      | Cf_putative              | 5056938 | 5075965 | -                                                                                    | -             |
| 69      | Cf_putative              | 5091906 | 5112623 | -                                                                                    | -             |
| 70      | Cf_saccharide            | 5115568 | 5137028 | Cinnamycin_biosynthetic_gene_cluster (14% of genes show similarity)                  | BGC0000503_c1 |
| 71      | Thiopeptide-Lantipeptide | 5148607 | 5198127 | Platencin_biosynthetic_gene_cluster (9% of genes show similarity)                    | BGC0001156_c1 |
| 72      | Cf_putative              | 5252521 | 5267752 | -                                                                                    | -             |
| 73      | Cf_putative              | 5295608 | 5302772 | -                                                                                    | -             |
| 74      | Cf_putative              | 5350993 | 5371873 | Siomycin_biosynthetic_gene_cluster (7% of genes show similarity)                     | BGC0000655_c1 |
| 75      | Cf_saccharide            | 5409224 | 5430267 | -                                                                                    | -             |

**Table S2: Biosynthesis cluster information.** Summary of the antiSMASH biosynthesis cluster prediction for the genome of *S. chartreusis* NRRL 3882. Clusters for which products were found are marked in red. (page 4 of 6)

| Cluster | Type                       | From    | To      | Most similar known cluster                                                  | MIBiG BGC-ID  |
|---------|----------------------------|---------|---------|-----------------------------------------------------------------------------|---------------|
| 76      | Cf_saccharide              | 5482688 | 5524918 | -                                                                           | -             |
| 77      | Cf_saccharide              | 5531260 | 5553635 | -                                                                           | -             |
| 78      | Cf_saccharide              | 5651601 | 5673607 | -                                                                           | -             |
| 79      | Siderophore                | 5728969 | 5743480 | Desferrioxamine_B_biosynthetic_gene_cluster (100% of genes show similarity) | BGC0000940_c1 |
| 80      | Cf_saccharide-Melanin      | 5817869 | 5853889 | Melanin_biosynthetic_gene_cluster (60% of genes show similarity)            | BGC0000909_c1 |
| 81      | Cf_saccharide              | 6002584 | 6023792 | -                                                                           | -             |
| 82      | Lasso peptide              | 6075771 | 6098560 | -                                                                           | -             |
| 83      | Cf_putative                | 6145635 | 6164789 | -                                                                           | -             |
| 84      | Terpene-Nrps-Cf_saccharide | 6178346 | 6239867 | SCO-2138_biosynthetic_gene_cluster (92% of genes show similarity)           | BGC0000595_c1 |
| 85      | Cf_fatty_acid              | 6262817 | 6284345 | Fredericamycin_biosynthetic_gene_cluster (6% of genes show similarity)      | BGC0000224_c1 |
| 86      | Cf_saccharide              | 6316501 | 6366056 | -                                                                           | -             |
| 87      | Cf_putative                | 6366239 | 6375787 | Platencin_biosynthetic_gene_cluster (6% of genes show similarity)           | BGC0001156_c1 |
| 88      | Nrps-T1pks                 | 6393467 | 6444104 | Rifamycin_biosynthetic_gene_cluster (12% of genes show similarity)          | BGC0000136_c1 |
| 89      | Cf_saccharide              | 6538442 | 6560097 | -                                                                           | -             |
| 90      | Cf_saccharide              | 6592205 | 6613524 | -                                                                           | -             |
| 91      | Cf_putative                | 6625323 | 6642789 | -                                                                           | -             |
| 92      | Cf_saccharide              | 6649649 | 6670746 | -                                                                           | -             |
| 93      | Cf_putative                | 6737016 | 6745860 | -                                                                           | -             |
| 94      | Cf_putative                | 6806690 | 6812867 | Paromomycin_biosynthetic_gene_cluster (5% of genes show similarity)         | BGC0000712_c1 |
| 95      | Terpene                    | 6826993 | 6848153 | -                                                                           | -             |
| 96      | Cf_putative                | 6919044 | 6926625 | -                                                                           | -             |
| 97      | Ectoine                    | 6960000 | 6970398 | Ectoine_biosynthetic_gene_cluster (75% of genes show similarity)            | BGC0000853_c1 |
| 98      | Cf_putative                | 6992575 | 7009930 | -                                                                           | -             |
| 99      | Cf_saccharide              | 7059287 | 7080432 | Scabichelin_biosynthetic_gene_cluster (30% of genes show similarity)        | BGC0000423_c1 |
| 100     | Cf_putative                | 7090595 | 7095058 | UK-68,597_biosynthetic_gene_cluster (4% of genes show similarity)           | BGC0001178_c1 |

**Table S2: Biosynthesis cluster information.** Summary of the antiSMASH biosynthesis cluster prediction for the genome of *S. chartreusis* NRRL 3882. Clusters for which products were found are marked in red. (page 5 of 6)

| Cluster | Type                                   | From    | To      | Most similar known cluster                                                | MIBiG BGC-ID  |
|---------|----------------------------------------|---------|---------|---------------------------------------------------------------------------|---------------|
| 101     | Cf_saccharide                          | 7121037 | 7147090 | -                                                                         | -             |
| 102     | Cf_putative                            | 7159737 | 7168952 | -                                                                         | -             |
| 103     | Cf_putative                            | 7178654 | 7185364 | -                                                                         | -             |
| 104     | Cf_putative                            | 7192906 | 7197539 | -                                                                         | -             |
| 105     | Cf_putative                            | 7327666 | 7347855 | Streptomycin_biosynthetic_gene_cluster (9% of genes show similarity)      | BGC0000717_c1 |
| 106     | Cf_saccharide                          | 7367583 | 7389850 | -                                                                         | -             |
| 107     | Cf_putative                            | 7447059 | 7456919 | -                                                                         | -             |
| 108     | Cf_saccharide                          | 7464954 | 7500646 | -                                                                         | -             |
| 109     | Cf_putative                            | 7582886 | 7590962 | Kirromycin_biosynthetic_gene_cluster (3% of genes show similarity)        | BGC0001070_c1 |
| 110     | Cf_putative                            | 7621529 | 7645776 | -                                                                         | -             |
| 111     | Cf_putative                            | 7720756 | 7726239 | Herboxidiene_biosynthetic_gene_cluster (3% of genes show similarity)      | BGC0001065_c1 |
| 112     | T1pks                                  | 7796901 | 7892757 | Calcimycin_biosynthetic_gene_cluster (100% of genes show similarity)      | BGC0000032_c1 |
| 113     | Cf_putative                            | 7930155 | 7953004 | -                                                                         | -             |
| 114     | Cf_putative                            | 8102874 | 8114289 | -                                                                         | -             |
| 115     | Cf_putative                            | 8117762 | 8128535 | -                                                                         | -             |
| 116     | Cf_putative                            | 8174644 | 8185905 | -                                                                         | -             |
| 117     | Cf_saccharide                          | 8211895 | 8234579 | -                                                                         | -             |
| 118     | Cf_putative                            | 8235448 | 8300245 | Yatakemycin_biosynthetic_gene_cluster (6% of genes show similarity)       | BGC0000466_c1 |
| 119     | Cf_putative                            | 8316757 | 8327018 | -                                                                         | -             |
| 120     | Terpene                                | 8400535 | 8421605 | Versipelostatin_biosynthetic_gene_cluster (5% of genes show similarity)   | BGC0001204_c1 |
| 121     | Bacteriocin-Lantipeptide-Cf_saccharide | 8450351 | 8500179 | Informatipeptin_biosynthetic_gene_cluster (100% of genes show similarity) | BGC0000518_c1 |
| 122     | Cf_putative                            | 8505757 | 8520562 | -                                                                         | -             |
| 123     | T1pks                                  | 8552652 | 8596677 | Maduropeptin_biosynthetic_gene_cluster (3% of genes show similarity)      | BGC0001008_c1 |
| 124     | Cf_saccharide                          | 8628530 | 8650002 | A-500359s_biosynthetic_gene_cluster (5% of genes show similarity)         | BGC0000949_c1 |
| 125     | T3pks                                  | 8649961 | 8691346 | -                                                                         | -             |

**Table S2: Biosynthesis cluster information.** Summary of the antiSMASH biosynthesis cluster prediction for the genome of *S. chartreusis* NRRL 3882. Clusters for which products were found are marked in red. (page 6 of 6)

| Cluster | Type        | From    | To      | Most similar known cluster | MIBiG BGC-ID |
|---------|-------------|---------|---------|----------------------------|--------------|
| 126     | Cf_putative | 8733683 | 8741218 | -                          | -            |
| 127     | Cf_putative | 8875738 | 8889232 | -                          | -            |
| 128     | Cf_putative | 8896783 | 8916705 | -                          | -            |



**Table S3: Summary of mass spectrometric identification.** Data gathered on all identified compounds. Nomenclature in italics indicate compounds discovered in this study. The newly isolated compound is indicated by bold letters.

| Name                            | Measured mass [M+H] <sup>+</sup> | Theoretical mass [M+H] <sup>+</sup> | Δppm  | Sum formula [H] <sup>+</sup>                                   | Reference & PubChem identifier |
|---------------------------------|----------------------------------|-------------------------------------|-------|----------------------------------------------------------------|--------------------------------|
| Calcimycin                      |                                  |                                     |       |                                                                |                                |
| Calcimycin                      | 524.2763                         | 524.2761                            | 0.381 | C <sub>29</sub> H <sub>38</sub> N <sub>3</sub> O <sub>6</sub>  | 1,2                            |
| <b>Cal-01 (deoxacalcimycin)</b> | 513.2596                         | 513.2601                            | 0.974 | C <sub>28</sub> H <sub>37</sub> N <sub>2</sub> O <sub>7</sub>  | <i>this study</i>              |
| N-demethyl-calcimycin           | 510.2597                         | 510.2604                            | 1.372 | C <sub>28</sub> H <sub>36</sub> N <sub>3</sub> O <sub>6</sub>  | 1,2                            |
| Cezomycin                       | 495.2496                         | 495.2495                            | 0.202 | C <sub>28</sub> H <sub>35</sub> N <sub>2</sub> O <sub>6</sub>  | 1,2                            |
| <b>Cal-02</b>                   | 494.2645                         | 494.2655                            | 2.023 | C <sub>28</sub> H <sub>36</sub> N <sub>3</sub> O <sub>5</sub>  | <i>this study</i>              |
| Tunicamycin                     |                                  |                                     |       |                                                                |                                |
| <i>Tuni-01 18:1</i>             | 873.4699                         | 873.4709                            | 1.145 | C <sub>41</sub> H <sub>69</sub> N <sub>4</sub> O <sub>16</sub> | <i>this study</i>              |
| Tunicamycin D                   | 859.4554                         | 859.4552                            | 0.233 | C <sub>40</sub> H <sub>67</sub> N <sub>4</sub> O <sub>16</sub> | CID 56927841                   |
| <i>Tuni-02 16:0</i>             | 847.4555                         | 847.4552                            | 0.354 | C <sub>39</sub> H <sub>67</sub> N <sub>4</sub> O <sub>16</sub> | <i>this study</i>              |
| Tunicamycin B                   | 845.4402                         | 845.4396                            | 0.710 | C <sub>39</sub> H <sub>65</sub> N <sub>4</sub> O <sub>16</sub> | CID 56927836                   |
| Tunicamycin VI                  | 833.4388                         | 833.4396                            | 0.960 | C <sub>38</sub> H <sub>65</sub> N <sub>4</sub> O <sub>16</sub> | CID 56927835                   |
| Tunicamycin A                   | 831.4263                         | 831.4239                            | 2.887 | C <sub>38</sub> H <sub>63</sub> N <sub>4</sub> O <sub>16</sub> | CID 11104835                   |
| <i>Tuni-03 14:0</i>             | 819.4261                         | 819.4239                            | 2.685 | C <sub>37</sub> H <sub>63</sub> N <sub>4</sub> O <sub>16</sub> | <i>this study</i>              |
| <i>Tuni-04 13:0</i>             | 805.4073                         | 805.4083                            | 1.242 | C <sub>36</sub> H <sub>61</sub> N <sub>4</sub> O <sub>16</sub> | <i>this study</i>              |
| Tunicamycin I                   | 803.3934                         | 803.3926                            | 0.996 | C <sub>36</sub> H <sub>59</sub> N <sub>4</sub> O <sub>16</sub> | CID 56927848                   |
| Desferrioxamine                 |                                  |                                     |       |                                                                |                                |
| <i>Desf-01</i>                  | 633.3817                         | 633.3823                            | 0.947 | C <sub>28</sub> H <sub>53</sub> N <sub>6</sub> O <sub>10</sub> | <i>this study</i>              |
| Desferrioxamine G1              | 619.3661                         | 619.3667                            | 0.969 | C <sub>27</sub> H <sub>51</sub> N <sub>6</sub> O <sub>10</sub> | 3                              |
| Desferrioxamine D1              | 603.3706                         | 603.3718                            | 1.989 | C <sub>27</sub> H <sub>51</sub> N <sub>6</sub> O <sub>9</sub>  | CID 10008761                   |
| Desferrioxamine E               | 601.3572                         | 601.3561                            | 1.829 | C <sub>27</sub> H <sub>49</sub> N <sub>6</sub> O <sub>9</sub>  | 3                              |
| <i>Desf-02</i>                  | 599.3407                         | 599.3405                            | 0.334 | C <sub>27</sub> H <sub>47</sub> N <sub>6</sub> O <sub>9</sub>  | <i>this study</i>              |
| Desferrioxamine D2              | 587.3411                         | 587.3405                            | 1.022 | C <sub>26</sub> H <sub>47</sub> N <sub>6</sub> O <sub>9</sub>  | 4                              |
| <i>Desf-03</i>                  | 585.3613                         | 585.3612                            | 0.171 | C <sub>27</sub> H <sub>49</sub> N <sub>6</sub> O <sub>8</sub>  | <i>this study</i>              |
| <i>Desf-04</i>                  | 577.3570                         | 577.3561                            | 1.559 | C <sub>25</sub> H <sub>49</sub> N <sub>6</sub> O <sub>9</sub>  | <i>this study</i>              |
| <i>Desf-05</i>                  | 575.3762                         | 575.3768                            | 1.043 | C <sub>26</sub> H <sub>51</sub> N <sub>6</sub> O <sub>8</sub>  | <i>this study</i>              |
| Desferrioxamine X1/7            | 573.3251                         | 573.3248                            | 0.523 | C <sub>25</sub> H <sub>45</sub> N <sub>6</sub> O <sub>9</sub>  | 4                              |
| Desferrioxamine B               | 561.3621                         | 561.3612                            | 1.603 | C <sub>25</sub> H <sub>49</sub> N <sub>6</sub> O <sub>8</sub>  | 3                              |
| Desferrioxamine A1              | 547.3455                         | 547.3455                            | 0.000 | C <sub>24</sub> H <sub>47</sub> N <sub>6</sub> O <sub>8</sub>  | 4                              |
| Desferrioxamine uA1             | 545.3658                         | 545.3663                            | 0.917 | C <sub>25</sub> H <sub>49</sub> N <sub>6</sub> O <sub>7</sub>  | 4                              |
| <i>Desf-06</i>                  | 537.3605                         | 537.3612                            | 1.303 | C <sub>23</sub> H <sub>49</sub> N <sub>6</sub> O <sub>8</sub>  | <i>this study</i>              |
| Desferrioxamine A2              | 533.3291                         | 533.3299                            | 1.500 | C <sub>23</sub> H <sub>45</sub> N <sub>6</sub> O <sub>8</sub>  | 4                              |
| <i>Desf-07</i>                  | 518.3184                         | 518.3190                            | 1.158 | C <sub>23</sub> H <sub>44</sub> N <sub>5</sub> O <sub>8</sub>  | <i>this study</i>              |
| <i>Desf-08</i>                  | 493.3344                         | 493.3350                            | 1.216 | C <sub>21</sub> H <sub>45</sub> N <sub>6</sub> O <sub>7</sub>  | <i>this study</i>              |
| Bisucaberin                     |                                  |                                     |       |                                                                |                                |
| Ferrioxamine H                  | 461.2611                         | 461.2611                            | 0.000 | C <sub>20</sub> H <sub>37</sub> N <sub>4</sub> O <sub>8</sub>  | 5                              |
| <i>Bisu-01</i>                  | 443.2491                         | 443.2506                            | 3.384 | C <sub>20</sub> H <sub>35</sub> N <sub>4</sub> O <sub>7</sub>  | <i>this study</i>              |
| <i>Bisu-02</i>                  | 433.2662                         | 433.2662                            | 0.000 | C <sub>19</sub> H <sub>37</sub> N <sub>4</sub> O <sub>7</sub>  | <i>this study</i>              |
| <i>Bisu-03</i>                  | 429.2344                         | 429.2349                            | 1.165 | C <sub>19</sub> H <sub>33</sub> N <sub>4</sub> O <sub>7</sub>  | <i>this study</i>              |
| Bisucaberin                     | 401.2392                         | 401.2400                            | 1.994 | C <sub>18</sub> H <sub>33</sub> N <sub>4</sub> O <sub>6</sub>  | 6                              |
| <i>Bisu-04</i>                  | 389.2389                         | 389.2400                            | 2.826 | C <sub>17</sub> H <sub>33</sub> N <sub>4</sub> O <sub>6</sub>  | <i>this study</i>              |
| dDFx[00-]                       | 361.2441                         | 361.2451                            | 2.768 | C <sub>16</sub> H <sub>33</sub> N <sub>4</sub> O <sub>5</sub>  | 7                              |
| <i>Bisu-05</i>                  | 345.2495                         | 345.2502                            | 2.028 | C <sub>16</sub> H <sub>33</sub> N <sub>4</sub> O <sub>4</sub>  | <i>this study</i>              |
| <i>Bisu-06</i>                  | 303.2403                         | 303.2396                            | 2.308 | C <sub>14</sub> H <sub>31</sub> N <sub>4</sub> O <sub>3</sub>  | <i>this study</i>              |
| <i>Bisu-07</i>                  | 302.2069                         | 302.2080                            | 3.640 | C <sub>14</sub> H <sub>28</sub> N <sub>3</sub> O <sub>4</sub>  | <i>this study</i>              |
| <i>Bisu-08</i>                  | 298.1394                         | 298.1403                            | 3.019 | C <sub>13</sub> H <sub>20</sub> N <sub>3</sub> O <sub>5</sub>  | <i>this study</i>              |
| <i>Bisu-09</i>                  | 293.1472                         | 293.1461                            | 3.752 | C <sub>10</sub> H <sub>21</sub> N <sub>4</sub> O <sub>6</sub>  | <i>this study</i>              |
| Coelichelin                     |                                  |                                     |       |                                                                |                                |
| Coelichelin                     | 566.2769                         | 566.2786                            | 3.002 | C <sub>21</sub> H <sub>40</sub> N <sub>7</sub> O <sub>11</sub> | 8                              |
| <i>Coeli-01</i>                 | 491.2468                         | 491.2466                            | 0.407 | C <sub>19</sub> H <sub>35</sub> N <sub>6</sub> O <sub>9</sub>  | <i>this study</i>              |
| Nalidixic acid                  |                                  |                                     |       |                                                                |                                |
| Nalidixic acid                  | 233.0930                         | 233.0926                            | 1.716 | C <sub>12</sub> H <sub>13</sub> N <sub>2</sub> O <sub>3</sub>  | 9                              |

**Table S4: Summary of database entries.** Identified compounds with corresponding database IDs of the GNPS library. The newly isolated compound is highlighted by bold letters.

| Name                            | Detected in supernatant | Analytic standard | Library ID         |
|---------------------------------|-------------------------|-------------------|--------------------|
| Calcimycin                      | x                       | x                 | CCMSLIB00003739947 |
| <b>Cal-01 (deoxacalcimycin)</b> | x                       |                   | CCMSLIB00003739953 |
| <i>N</i> -demethyl-calcimycin   | x                       |                   | CCMSLIB00003739954 |
| Cezomycin                       | x                       |                   | CCMSLIB00003739955 |
| <i>Cal-02</i>                   | x                       |                   | CCMSLIB00003739956 |
| <i>Tuni-01 18:1</i>             | x                       |                   | CCMSLIB00003739959 |
| Tunicamycin D                   | x                       |                   | CCMSLIB00003739960 |
| <i>Tuni-02 16:0</i>             | x                       |                   | CCMSLIB00003739961 |
| Tunicamycin B                   | x                       |                   | CCMSLIB00003739962 |
| Tunicamycin VI                  | x                       |                   | CCMSLIB00003739963 |
| Tunicamycin A                   | x                       |                   | CCMSLIB00003739964 |
| <i>Tuni-03 14:0</i>             | x                       |                   | CCMSLIB00003739965 |
| <i>Tuni-04 13:0</i>             | x                       |                   | CCMSLIB00003739966 |
| Tunicamycin I                   | x                       |                   | CCMSLIB00003739967 |
| <i>Desf-01</i>                  | x                       |                   | CCMSLIB00003739969 |
| Desferrioxamine G1              | x                       |                   | CCMSLIB00003739970 |
| Desferrioxamine D1              | x                       |                   | CCMSLIB00003739971 |
| Desferrioxamine E               | x                       |                   | CCMSLIB00003739972 |
| <i>Desf-02</i>                  | x                       |                   | CCMSLIB00003739973 |
| Desferrioxamine D2              | x                       |                   | CCMSLIB00003739974 |
| <i>Desf-03</i>                  | x                       |                   | CCMSLIB00003739975 |
| <i>Desf-04</i>                  | x                       |                   | CCMSLIB00003739976 |
| <i>Desf-05</i>                  | x                       |                   | CCMSLIB00003739977 |
| Desferrioxamine X1/7            | x                       |                   | CCMSLIB00003739978 |
| Desferrioxamine B               | x                       |                   | CCMSLIB00003739979 |
| Desferrioxamine A1              | x                       |                   | CCMSLIB00003739980 |
| Desferrioxamine uA1             | x                       |                   | CCMSLIB00003739981 |
| <i>Desf-06</i>                  | x                       |                   | CCMSLIB00003739982 |
| Desferrioxamine A2              | x                       |                   | CCMSLIB00003739983 |
| <i>Desf-07</i>                  | x                       |                   | CCMSLIB00003739984 |
| <i>Desf-08</i>                  | x                       |                   | CCMSLIB00003739985 |
| Ferrioxamine H                  | x                       |                   | CCMSLIB00003739986 |
| <i>Bisu-01</i>                  | x                       |                   | CCMSLIB00003739987 |
| <i>Bisu-02</i>                  | x                       |                   | CCMSLIB00003739988 |
| <i>Bisu-03</i>                  | x                       |                   | CCMSLIB00003739989 |
| Bisucaberin                     | x                       |                   | CCMSLIB00003739968 |
| <i>Bisu-04</i>                  | x                       |                   | CCMSLIB00003739990 |
| dDFx[00-]                       | x                       |                   | CCMSLIB00003739991 |
| <i>Bisu-05</i>                  | x                       |                   | CCMSLIB00003739992 |
| <i>Bisu-06</i>                  | x                       |                   | CCMSLIB00003739993 |
| <i>Bisu-07</i>                  | x                       |                   | CCMSLIB00003739994 |
| <i>Bisu-08</i>                  | x                       |                   | CCMSLIB00003739995 |
| <i>Bisu-09</i>                  | x                       |                   | CCMSLIB00003739996 |
| Coelichelin                     | x                       |                   | CCMSLIB00003739957 |
| <i>Coeli-01</i>                 | x                       |                   | CCMSLIB00003739958 |
| Nalidixic acid                  | x                       | x                 | CCMSLIB00003739951 |
| Ampicillin                      |                         | x                 | CCMSLIB00003739946 |
| Bacillibactin                   |                         | x                 | CCMSLIB00003739997 |
| Erythromycin                    |                         | x                 | CCMSLIB00003739948 |
| Erythromycin A Enol Ether       |                         | x                 | CCMSLIB00003739949 |
| Monensin                        |                         | x                 | CCMSLIB00003739950 |
| Penicillin G                    |                         | x                 | CCMSLIB00003739952 |
| Tetracyclin                     |                         | x                 | CCMSLIB00003739945 |

**Table S5: Assigned <sup>1</sup>H (600 MHz) and <sup>13</sup>C (150 MHz) NMR data for deoxacalcimycin (CDCl<sub>3</sub>).**

| position | $\delta_c$ , type     | $\delta_H$ (J in Hz)     | COSY <sup>b</sup> | HMBC <sup>c</sup>      | NOESY <sup>b</sup> |
|----------|-----------------------|--------------------------|-------------------|------------------------|--------------------|
| 1        | 170.0, C              |                          |                   |                        |                    |
| 2        | 122.3, C              |                          |                   |                        |                    |
| 3        | 123.3, CH             | 7.57, br d (7.8)         | 4                 | 1, 5, 7                |                    |
| 4        | 126.5, CH             | 7.19, t (7.8)            | 3,5               | 2, 6                   |                    |
| 5        | 125.6, CH             | 7.27-7.23, m             | 4                 | 3, 7                   |                    |
| 6        | 150.5, C              |                          |                   |                        |                    |
| 7        | 127.5, C              |                          |                   |                        |                    |
| 8-NH     |                       | 10.40, br s              |                   |                        | 10a, 11            |
| 9        | 172.4, C              |                          |                   |                        |                    |
| 10a      | 42.1, CH <sub>2</sub> | 2.69, dd (12.9, 8.1)     | 10b, 11           | 9, 11, 12              | 8-NH               |
| 10b      |                       | 2.46, dd (12.9, 7.4)     | 10a, 11           | 9, 11, 12              |                    |
| 11       | 69.1, CH              | 3.94, app. td (7.8, 2.1) | 10a, 10b, 12      | 9, 10, 13, 15, 27      | 8-NH               |
| 12       | 29.5, CH              | 1.42-1.36, m             | 27                | 13/14, 27              |                    |
| 13a      | 25.8, CH <sub>2</sub> | 1.26-1.18, m             | 13b, 14a          | 15, 27                 |                    |
| 13b      |                       | 1.09-1.03, m             | 13a               | 11                     |                    |
| 14a      | 25.7, CH <sub>2</sub> | 1.73, app td (13.6, 4.6) | 13a, 14b          | 12, 13, 15, 16         |                    |
| 14b      |                       | 1.04-0.98, m             | 14a               | 15                     |                    |
| 15       | 98.6, C               |                          |                   |                        |                    |
| 16       | 32.7, CH              | 1.66-1.59, m             | 17a, 28           | 14, 15, 17, 18, 28     |                    |
| 17a      | 35.0, CH <sub>2</sub> | 1.84-1.77, m             | 16                | 15, 18                 |                    |
| 17b      |                       | 1.33-1.27, m             |                   | 15, 16, 18, 19, 28, 29 |                    |
| 18       | 28.5, CH              | 1.84-1.77, m             | 19, 29            |                        |                    |
| 19       | 73.6, CH              | 3.89, dd (10.2, 1.7)     | 18, 20            | 15, 17, 20, 21, 29, 30 |                    |
| 20       | 43.0, CH              | 3.24, dq (10.2, 6.9)     | 19, 30            | 18, 19, 21, 22, 30     | 23                 |
| 21       | 196.0, C              |                          |                   |                        |                    |
| 22       | 132.9, C              |                          |                   |                        |                    |
| 23       | 119.6, CH             | 7.06-7.03, m             | 24                | 22, 24, 25             | 20                 |
| 24       | 111.0, CH             | 6.28-6.25, m             | 23, 25            | 22, 23, 25             |                    |
| 25       | 126.8, CH             | 7.10-7.08, m             | 24                | 22, 23, 24             |                    |
| 26-NH    |                       | 10.45, br s              |                   |                        |                    |
| 27       | 10.8, CH <sub>3</sub> | 0.88, d (6.6)            | 12                | 11, 12, 13             |                    |
| 28       | 16.4, CH <sub>3</sub> | 0.88, d (6.6)            | 16                | 15, 16, 17             |                    |
| 29       | 11.6, CH <sub>3</sub> | 0.99, d (7.0)            | 18                | 17, 18, 19             |                    |
| 30       | 12.9, CH <sub>3</sub> | 0.92, d (6.9)            | 20                | 19, 20, 21             |                    |

<sup>a</sup>  $\delta$  in ppm relative to residual solvent signal of CDCl<sub>3</sub> (<sup>1</sup>H: 7.26 ppm; <sup>13</sup>C: 77.16 ppm). <sup>b</sup> COSY and NOESY correlations are from the proton(s) stated to the indicated proton. <sup>c</sup> HMBC correlations are from the proton(s) stated to the indicated carbon.

## Supplementary figures

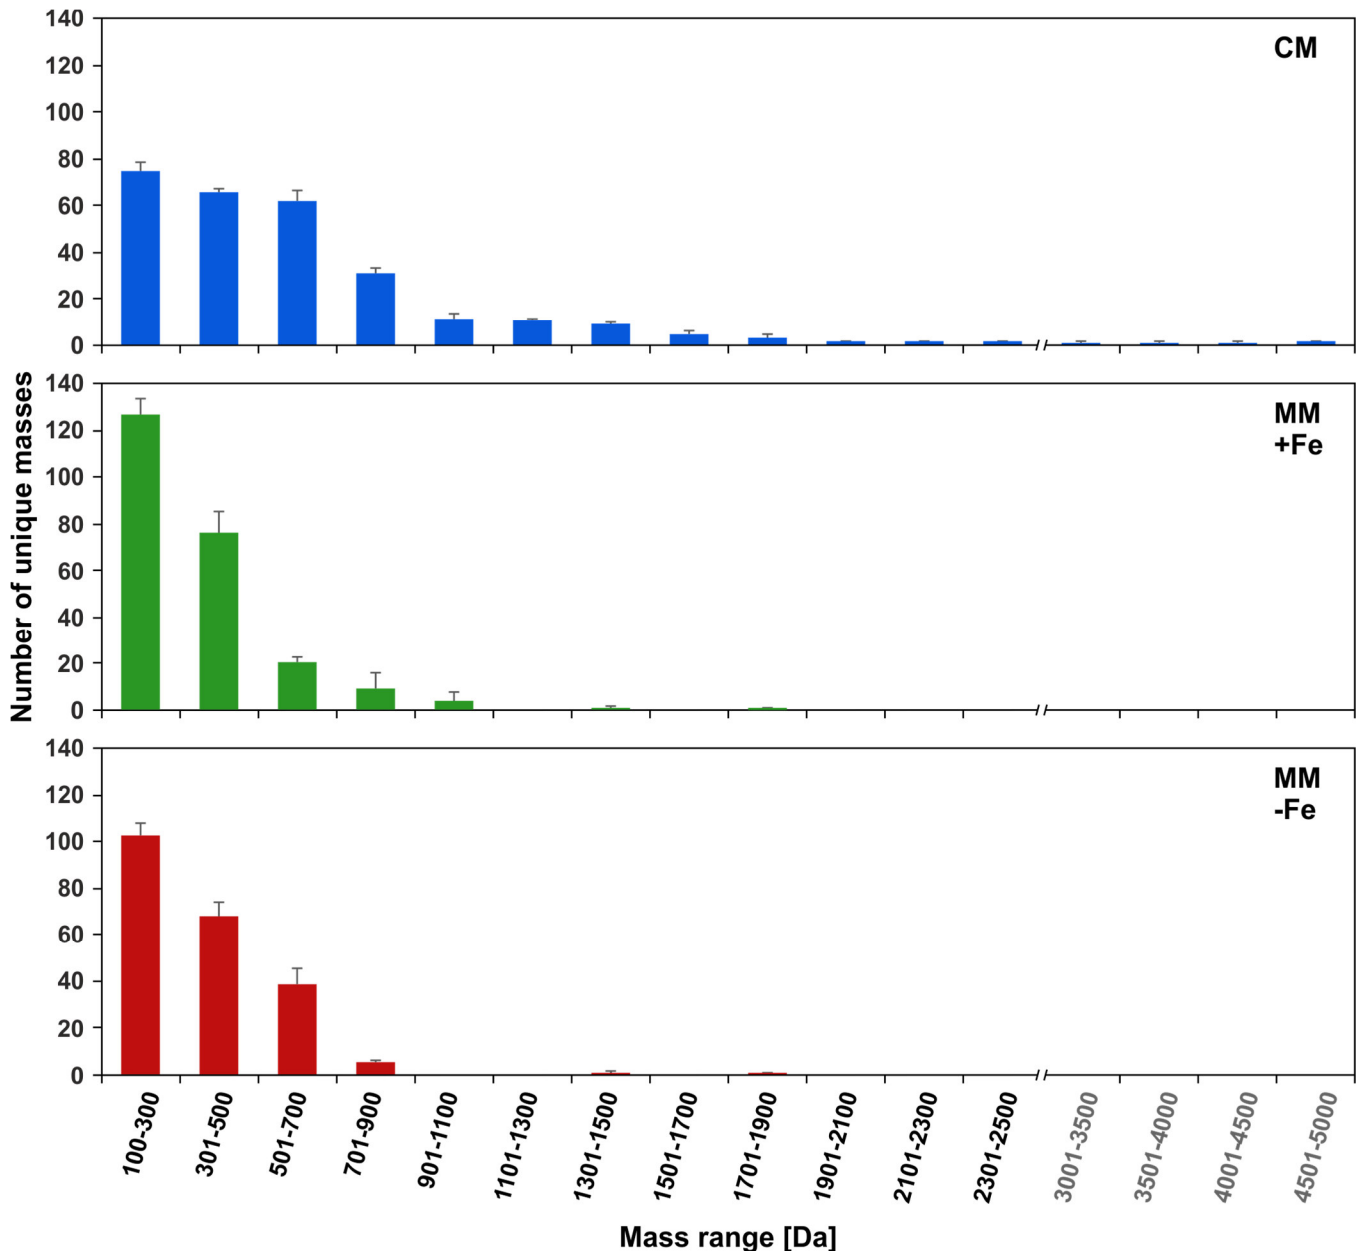

**Figure S1: Unique metabolites of *S. chartreus*.** *S. chartreus* produces unique and common metabolites when cultivated in complex medium (CM), minimal medium with (MM+Fe) and without (MM-Fe) iron. A sum of 701 unique parent masses was found under the tested cultivation conditions. No compounds were detected in the range of 2,501 to 3,000 Da. The experiment was performed in three independent biological replicates ( $n=3$ ), and averages with standard deviations are shown. Data were processed as described in materials and methods section (charge corrected, dereplicated, adducts eliminated and background and medium components removed).

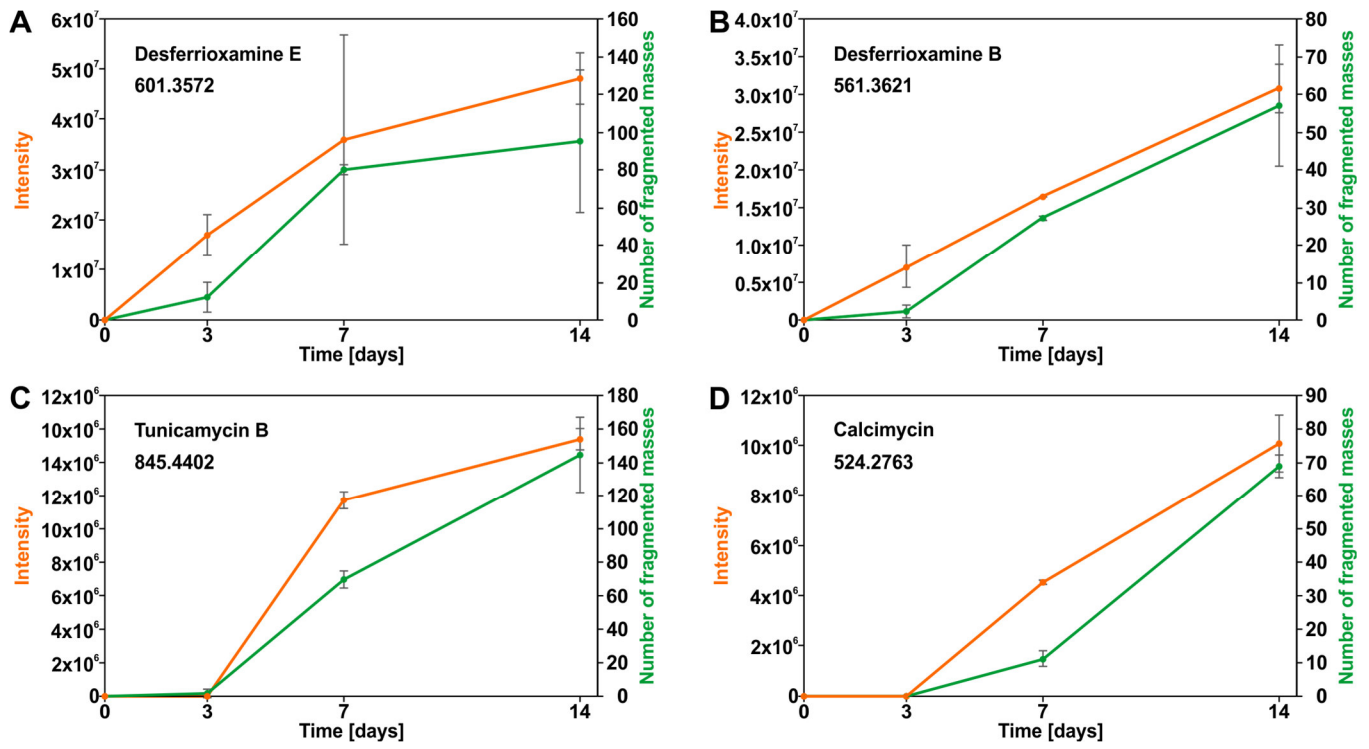

**Figure S2: Comparison of quantitation by signal intensity and spectral counting.** Exemplarily shown are the intensities and number of fragmented masses (spectral counts) of the siderophores desferrioxamine E and B, as well as the antibiotics calcimycin and tunicamycin B in complex medium (CM). The experiment was performed in three independent biological replicates ( $n=3$ ), and averages with standard deviations are shown.

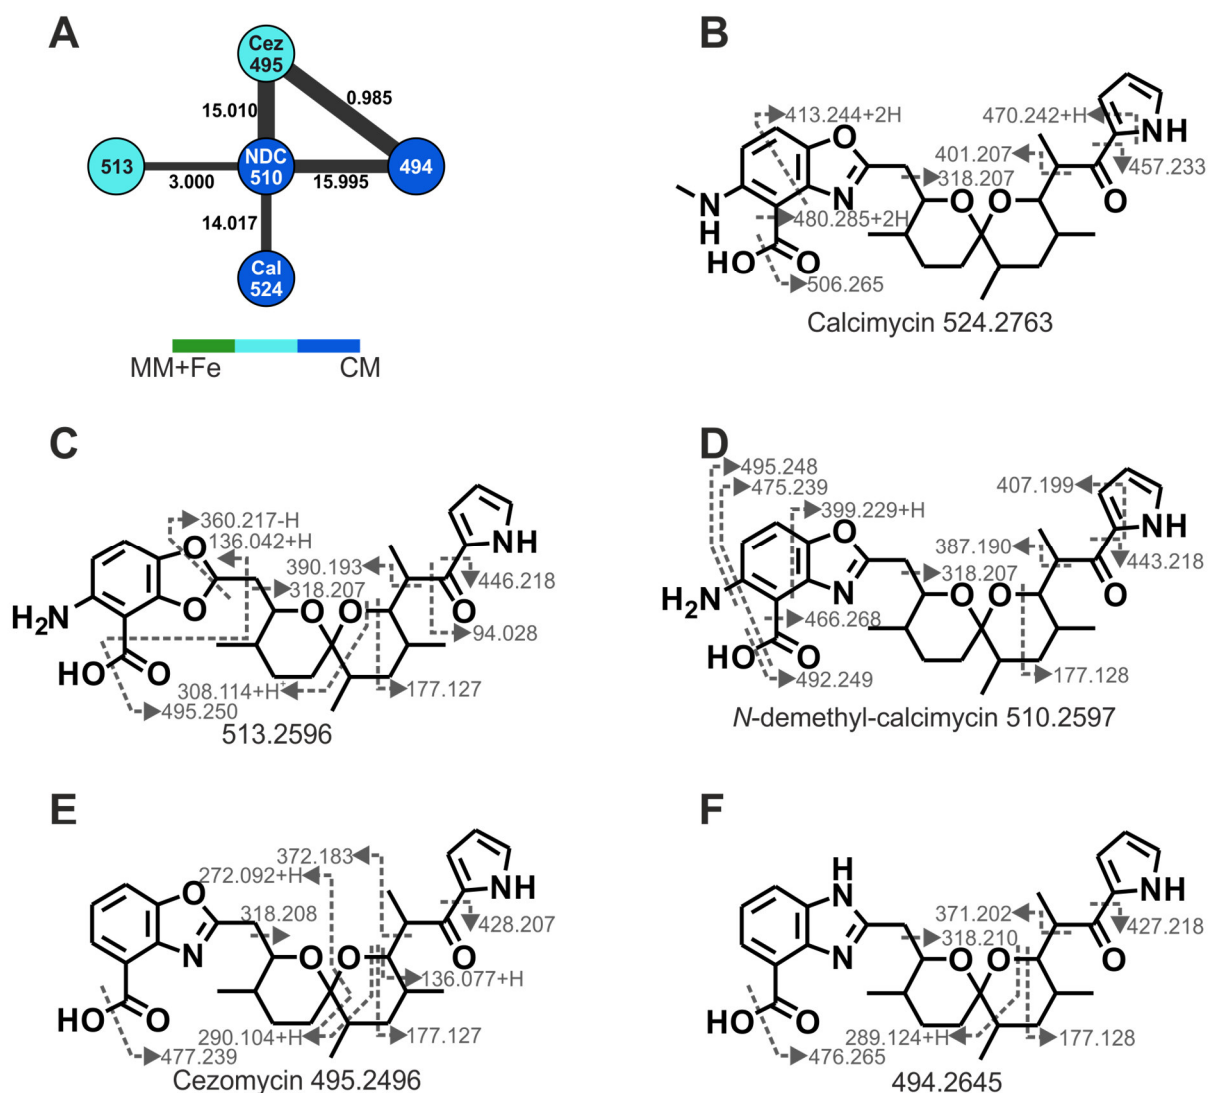

**Figure S3: Calcimycin subnetwork, structures and fragments.** (A) The molecular network of calcimycin. Molecules are represented by their protonated mass in Da and names of known variants. Colors indicate appearance in complex (CM, blue), minimal medium with iron (MM+Fe, green), or under both conditions (turquoise). The thicknesses of connecting lines indicate the cosine similarity of fragmentation spectra, while the factors given describe the mass difference in Da. (B-F) Structure predicted based on LC-MS/MS data and annotation of fragment spectra of all calcimycin derivatives. The final structure of compound C was determined by NMR analysis of purified deoxacalcimycin and deviates from the predicted structure (see Figure S10). Given are the masses of protonated molecules  $[M+H]^+$  and the  $m/z$  of detected fragments. Grey lines indicate fragmentation sites, while light grey connects fragmentation sites.

**A**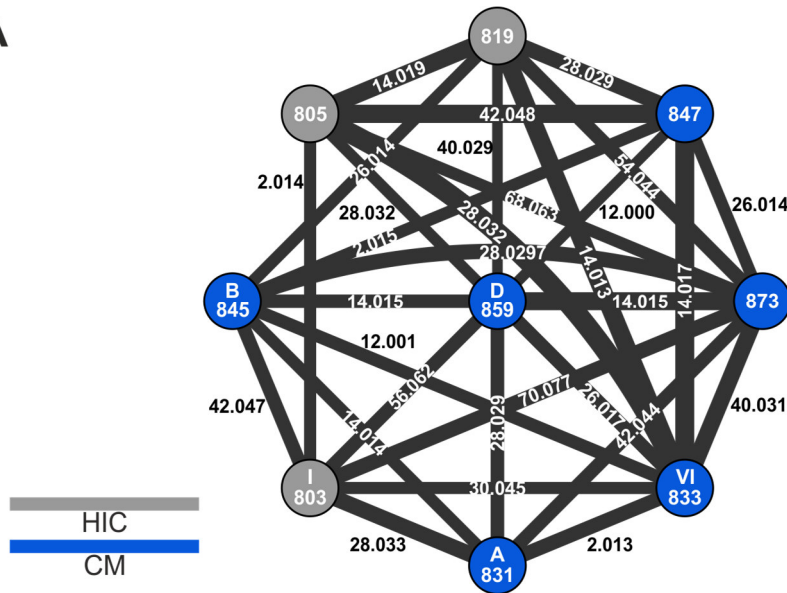**B**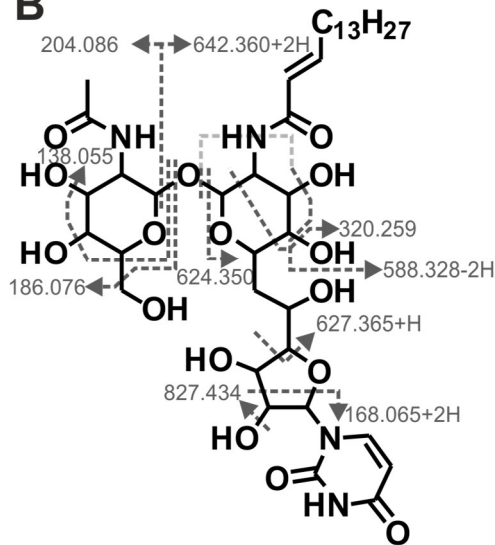Tunicamycin B 845.44 Da [ $+H^+$ ]**C**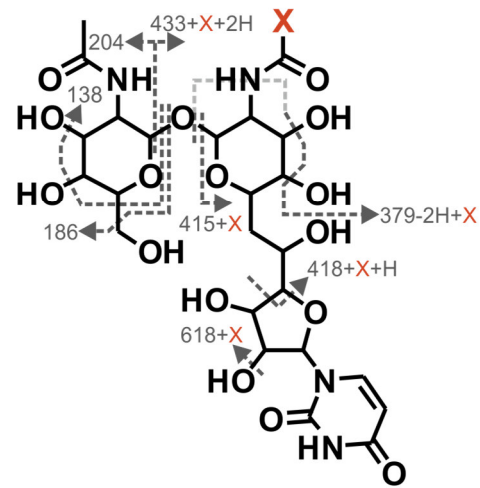**D**

| name                | parent mass<br>[ $M+H^+$ ] | retention time<br>[s] | composition    | X-chain<br>saturation |
|---------------------|----------------------------|-----------------------|----------------|-----------------------|
| Tunicamycin 13:1 I  | 803.3934                   | 1056.60               | $C_{12}H_{23}$ | unsaturated           |
| Tunicamycin 13:0    | 805.4073                   | 1063.93               | $C_{12}H_{25}$ | saturated             |
| Tunicamycin 14:0    | 819.4261                   | 1093.76               | $C_{13}H_{27}$ | saturated             |
| Tunicamycin 15:1 A  | 831.4263                   | 1117.77               | $C_{14}H_{27}$ | unsaturated           |
| Tunicamycin 15:0 VI | 833.4388                   | 1124.05               | $C_{14}H_{29}$ | saturated             |
| Tunicamycin 16:1 B  | 845.4402                   | 1133.37               | $C_{15}H_{29}$ | unsaturated           |
| Tunicamycin 16:0    | 847.4555                   | 1180.90               | $C_{15}H_{31}$ | saturated             |
| Tunicamycin 17:1 D  | 859.4554                   | 1184.52               | $C_{16}H_{31}$ | unsaturated           |
| Tunicamycin 18:1    | 873.4699                   | 1260.47               | $C_{17}H_{33}$ | unsaturated           |

**Figure S4: Tunicamycin subnetwork, structures, and fragments.** (A) The molecular network of tunicamycin. Molecules are represented by their protonated mass in Da and names of known variants. Colors indicate appearance in complex medium (CM, blue), and in the hydrophobic interaction purification of minimal medium without iron (HIC, grey). The thicknesses of connecting lines indicate the cosine similarity of fragmentation spectra, while the factors given describe the mass difference in Da. (B-D) Structure prediction and annotation of fragment spectra of all tunicamycin derivatives. Given are the masses of protonated molecules [ $M+H^+$ ] and the  $m/z$  of detected fragments. Grey lines indicate fragmentation sites, while light grey connects fragmentation sites.

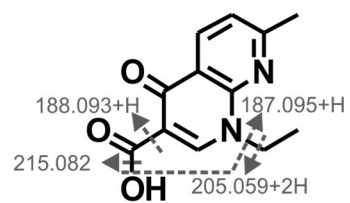

Nalidixic Acid 233.0930

**Figure S5: Nalidixic acid.** Annotation of the fragment spectrum of nalidixic acid. Given are the masses of protonated molecules  $[M+H]^+$  and the  $m/z$  of detected fragments. Grey lines indicate fragmentation sites.



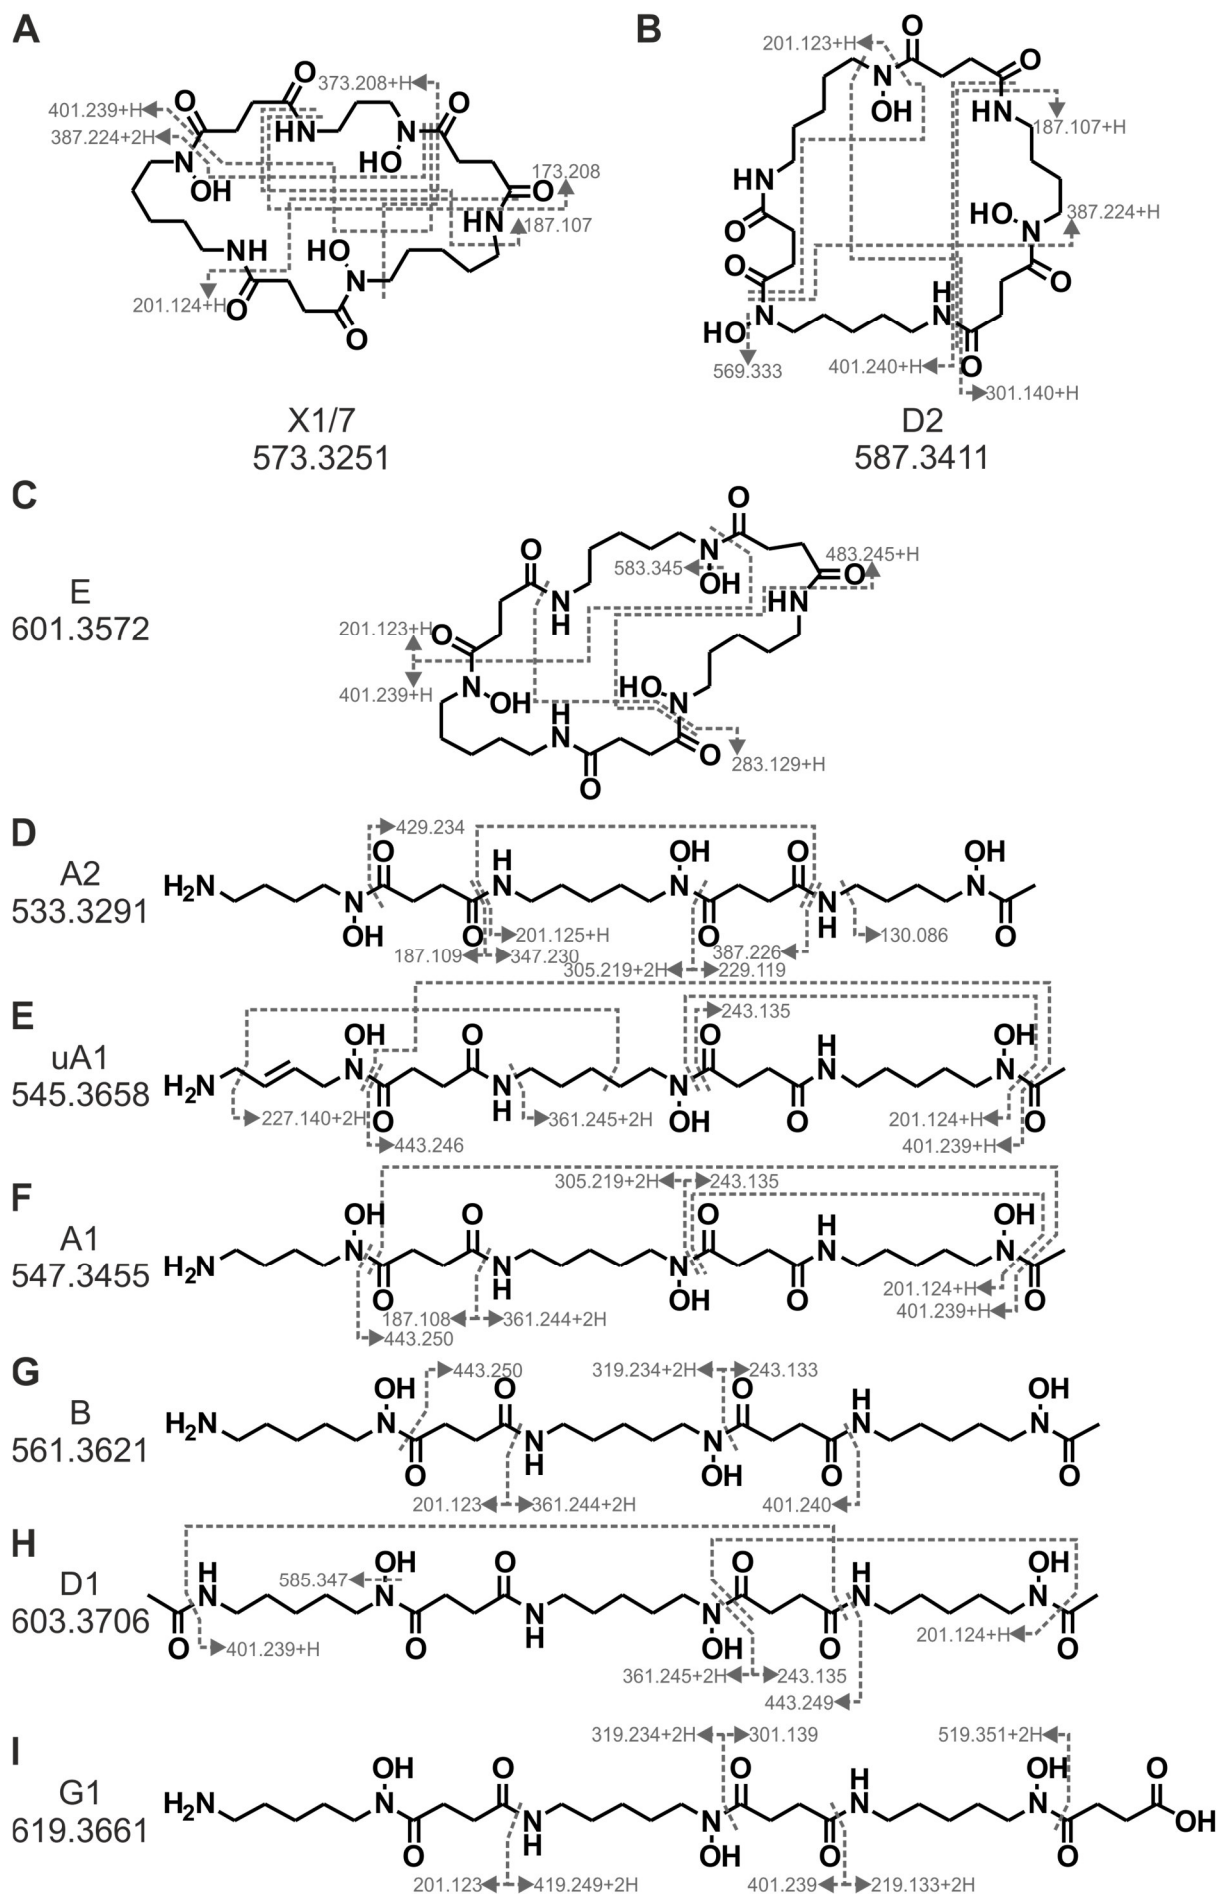

**Figure S6: Desferrioxamine subnetwork, structures, and fragments of known compounds.** Annotation of fragment spectra of all known desferrioxamine siderophores detected in this study. Given are the denotations, masses of protonated molecules  $[M+H]^+$ , and the  $m/z$  of detected fragments. Grey lines indicate fragmentation sites, while light grey connects fragmentation sites.

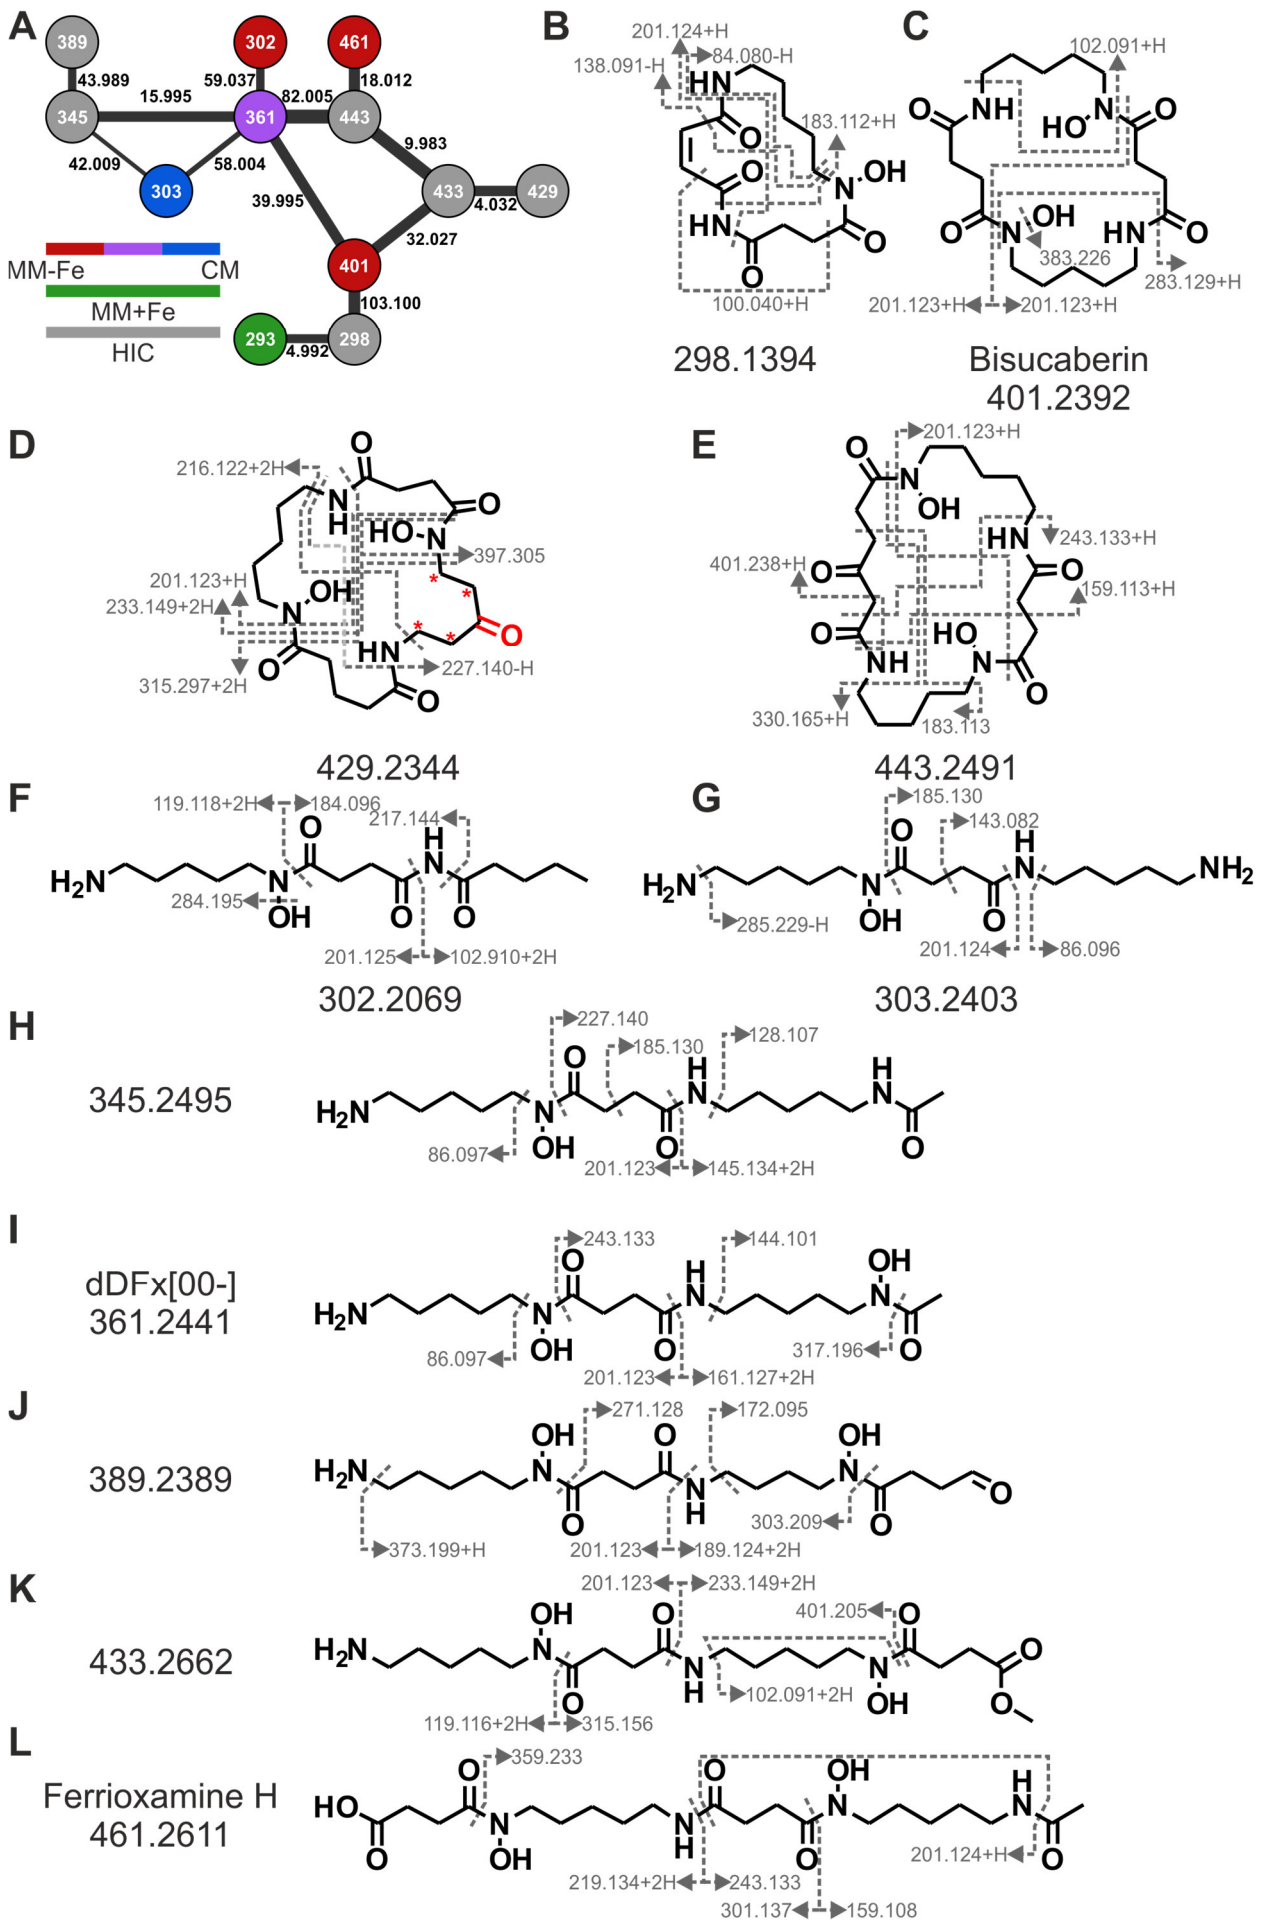

**Figure S7: Bisucaberin subnetwork, structures, and fragments.** (A) The molecular network of bisucaberin. Molecules are represented by their protonated mass in Da and names of known variants. Colors indicate appearance in complex (CM, blue), minimal medium without iron (MM-Fe, red), under both conditions (purple), in minimal medium with iron (MM+Fe, green), and in a hydrophobic interaction purification of minimal medium without iron (HIC, grey). The

thicknesses of connecting lines indicate the cosine similarity of fragmentation spectra, while the factors given describe the mass difference in Da. **(B-L)** Structure prediction and annotation of fragment spectra of bisucaberin derivatives. Given are the masses of protonated molecules  $[M+H]^+$  and the  $m/z$  of detected fragments. The red asterisk (\*) shows potential positions of red marked oxygen. Grey lines indicate fragmentation sites, while light grey connects fragmentation sites. No structure was predicted for compound 293.

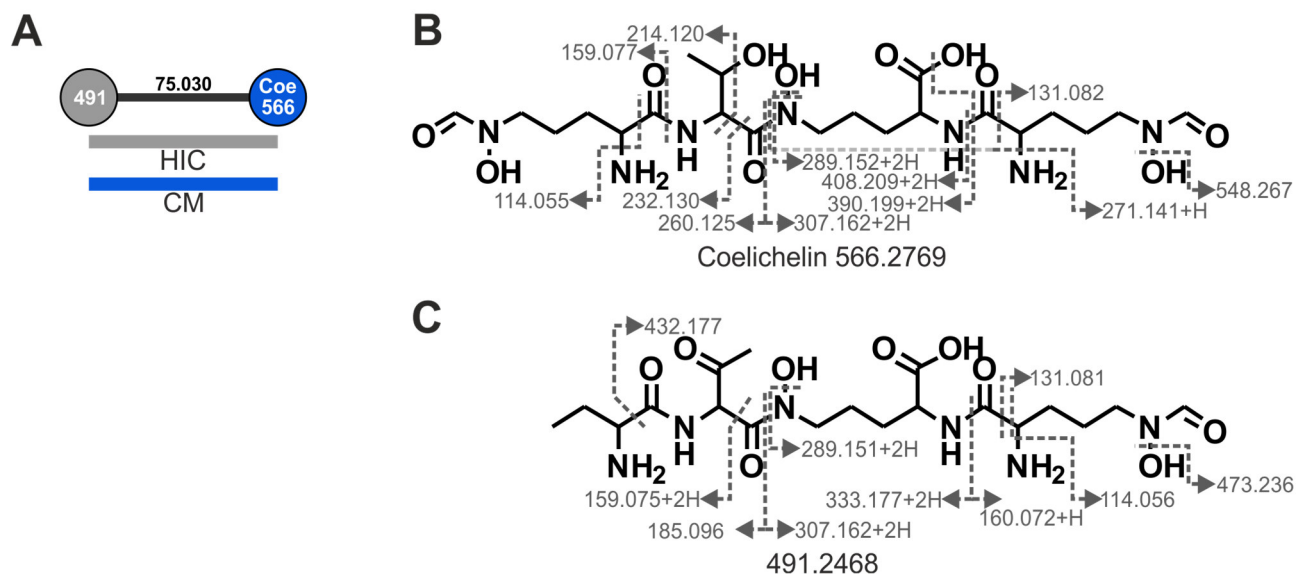

**Figure S8: Coelichelin subnetwork, structures and fragments.** **(A)** The molecular network of coelichelin. Molecules are represented by their protonated mass in Da and names of known variants. Colors indicate appearance in complex medium (CM, blue) and in a hydrophobic interaction purification of minimal medium without iron (HIC, grey). The thicknesses of connecting lines indicate the cosine similarity of fragmentation spectra, while the factors given describe the mass difference in Da. **(B, C)** Structure prediction and annotation of fragment spectra of all coelichelin derivatives. Given are the masses of protonated molecules  $[M+H]^+$  and the  $m/z$  of detected fragments. Grey lines indicate fragmentation sites, while light grey connects fragmentation sites.

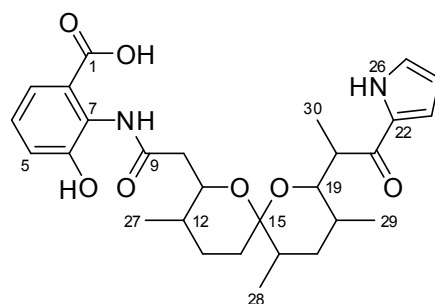

**Figure S9: Chemical structure of deoxacalcimycin.**  $[\alpha]^{25}_D = -82.5$  (c 0.1983 in  $\text{CHCl}_3$ ); IR  $\nu_{\text{max}}$  3271, 2964, 2933, 1692, 1638, 1545, 1465, 1431, 1408, 1386, 1374, 1276, 1239, 1197, 1137, 1078, 989, 940, 917, 889, 858, 815, 756  $\text{cm}^{-1}$ . HRESIMS  $m/z$  513.2594  $[M+H]^+$  (calcd for  $\text{C}_{28}\text{H}_{37}\text{N}_2\text{O}_7$ , 513.2595). ESI-MS/MS (CID,  $m/z$  513.25  $[M+H]^+$ ):  $m/z$  495.24 ( $[M+H-H_2O]^+$ ), 477.23 ( $[M+H-H_4O_2]^+$ ), 446.21 (b), 428.20 (b- $\text{H}_2\text{O}$ ), 360.21 (a), 342.20 (a- $\text{H}_2\text{O}$ ), 318.20, 293.17 (ab), 275.16 (ab- $\text{H}_2\text{O}$ ).

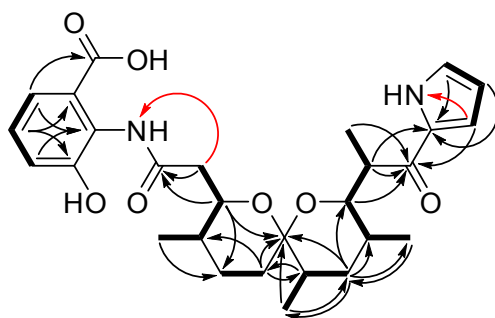

Figure S10: Selected COSY (bold bonds) and HMBC correlations (black:  $^1\text{H} \rightarrow ^{13}\text{C}$ ; red:  $^1\text{H} \rightarrow ^{15}\text{N}$ ) of deoxalcalcimycin.

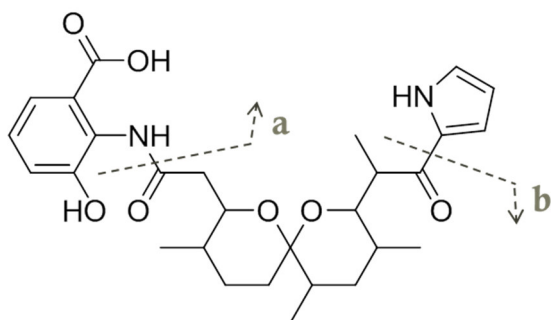

Figure S11: Proposed ESI-MS/MS fragmentation of deoxalcalcimycin.

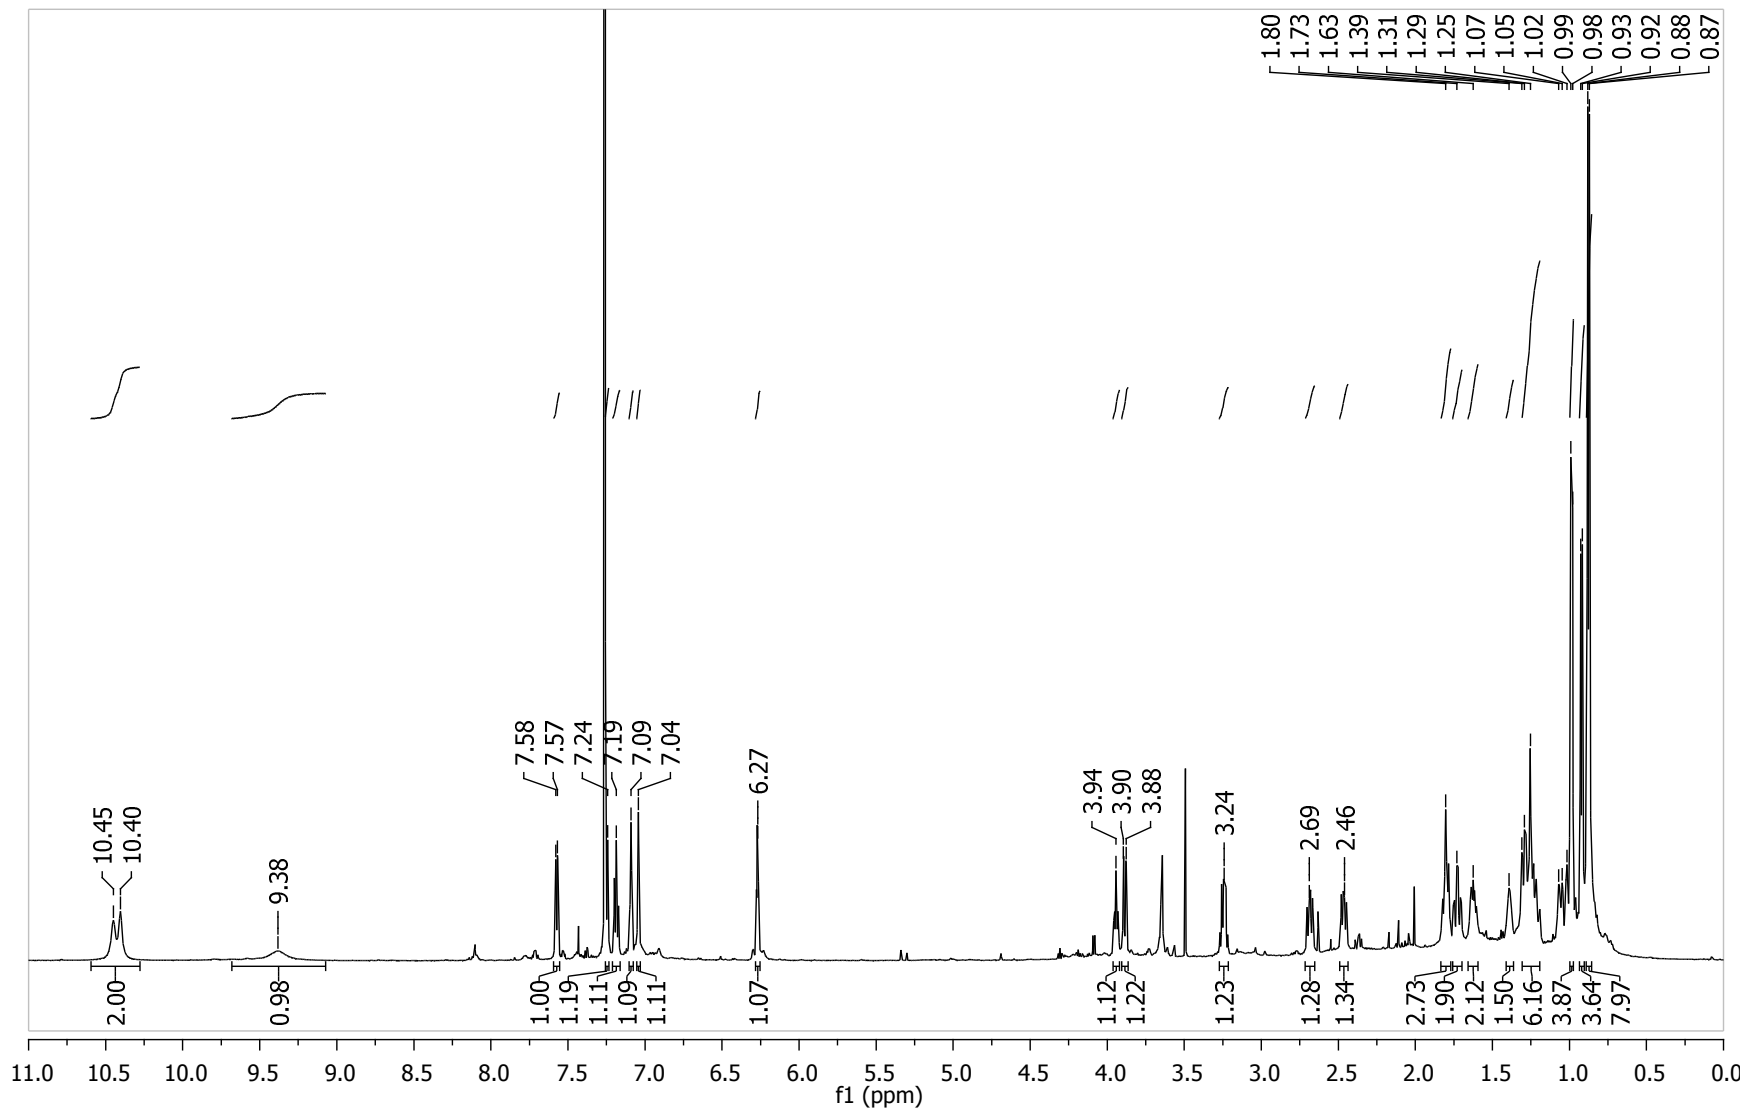

Figure S12: <sup>1</sup>H NMR spectrum (600 MHz) of deoxacalcimycin.

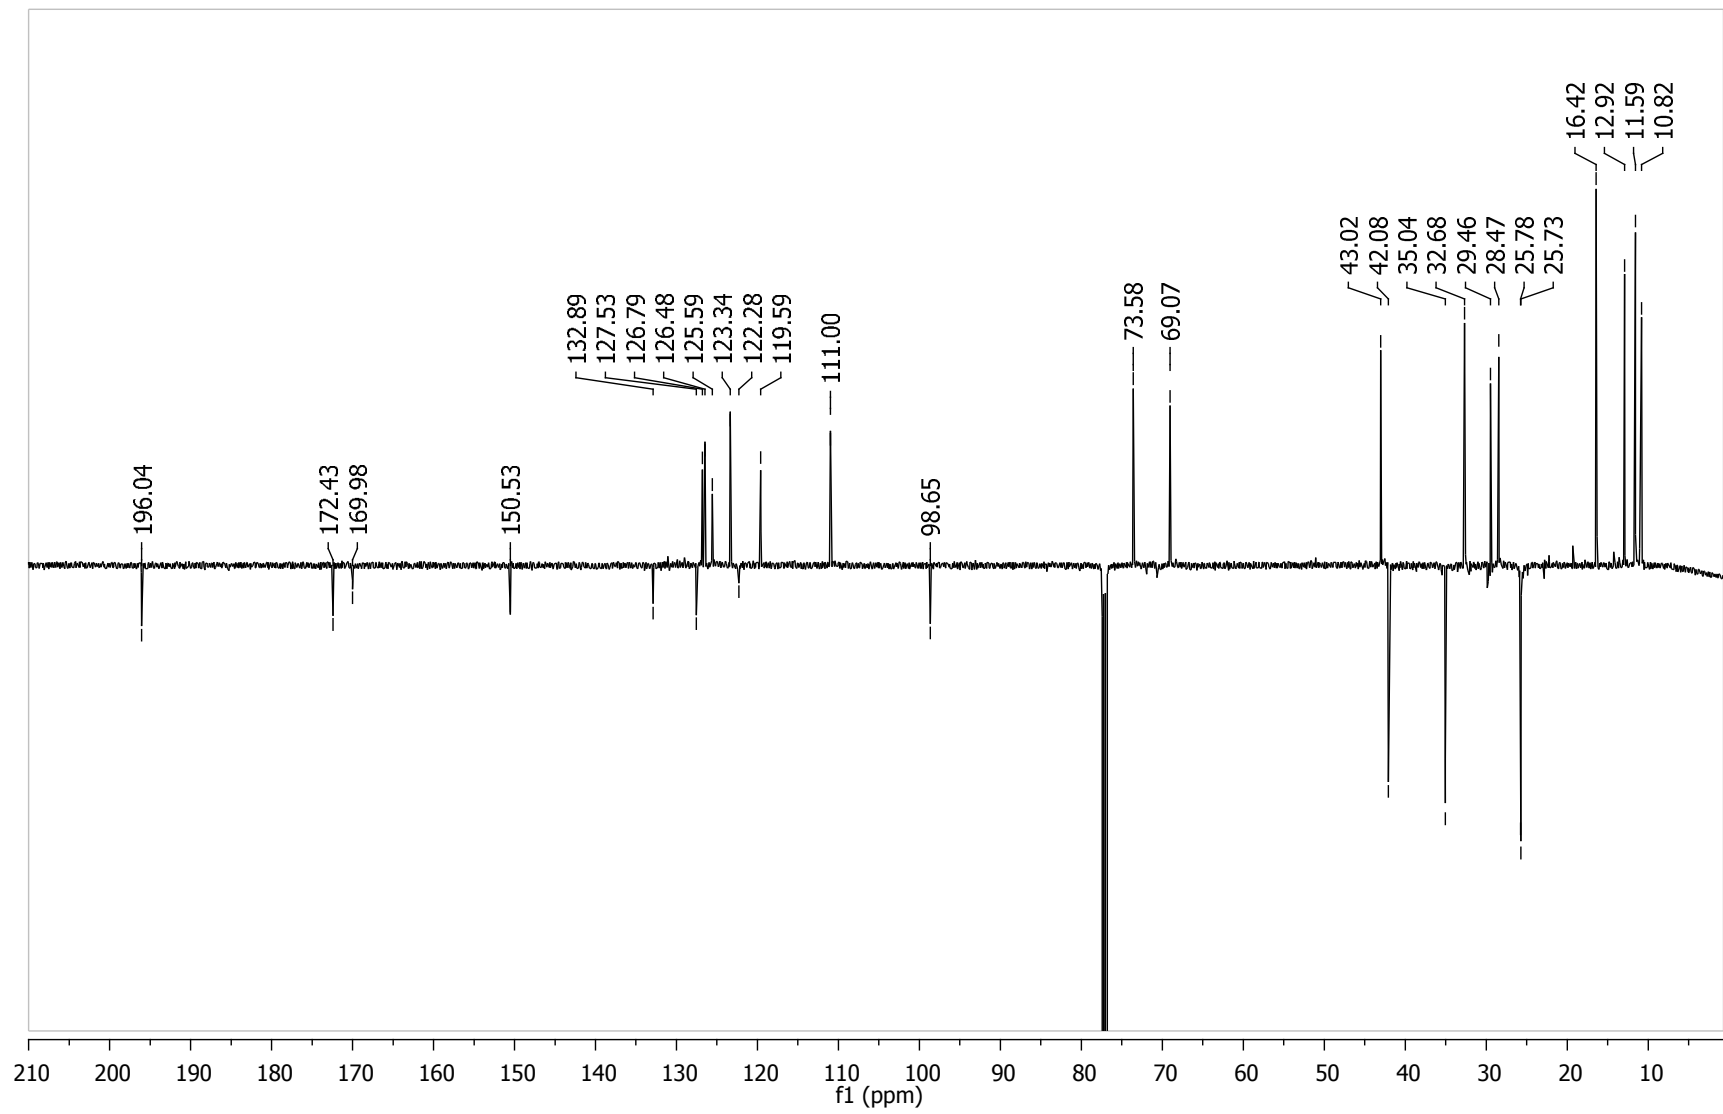

Figure S13: <sup>13</sup>C NMR spectrum (150 MHz) of deoxacalcimycin.

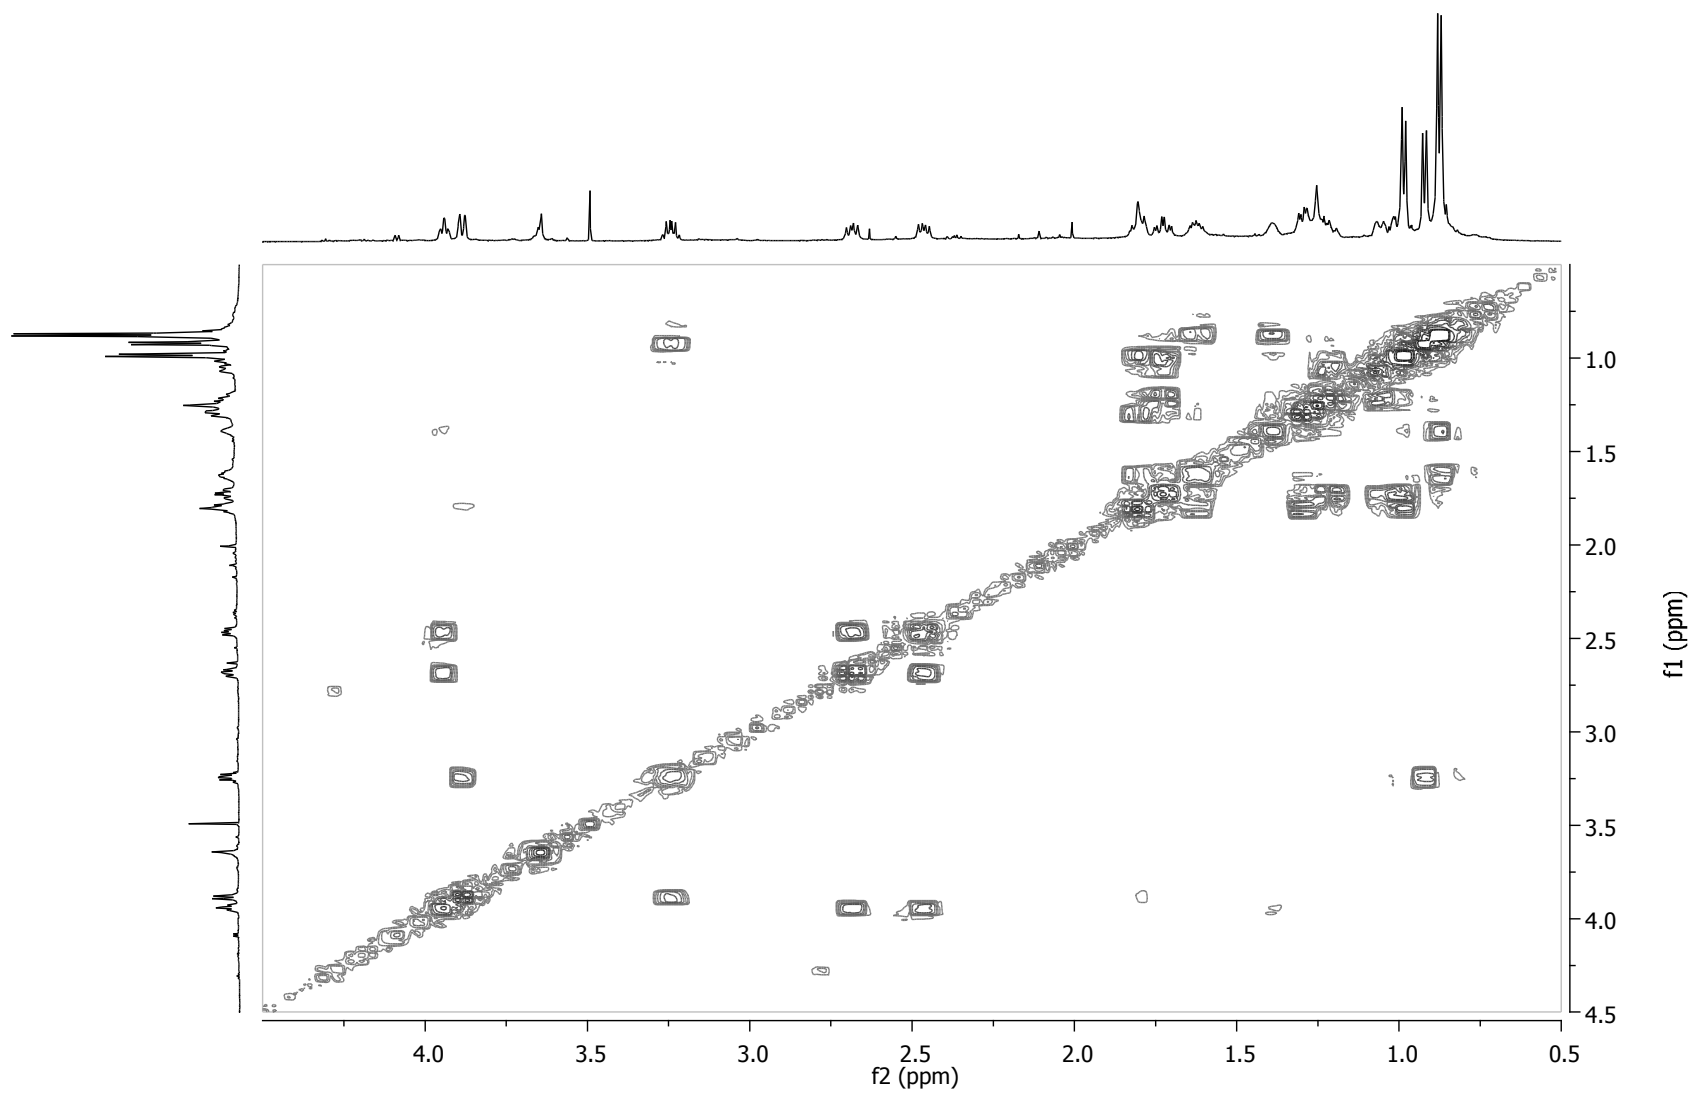

Figure S14: COSY spectrum (0.5-4.5 ppm) of deoxacalcimycin.

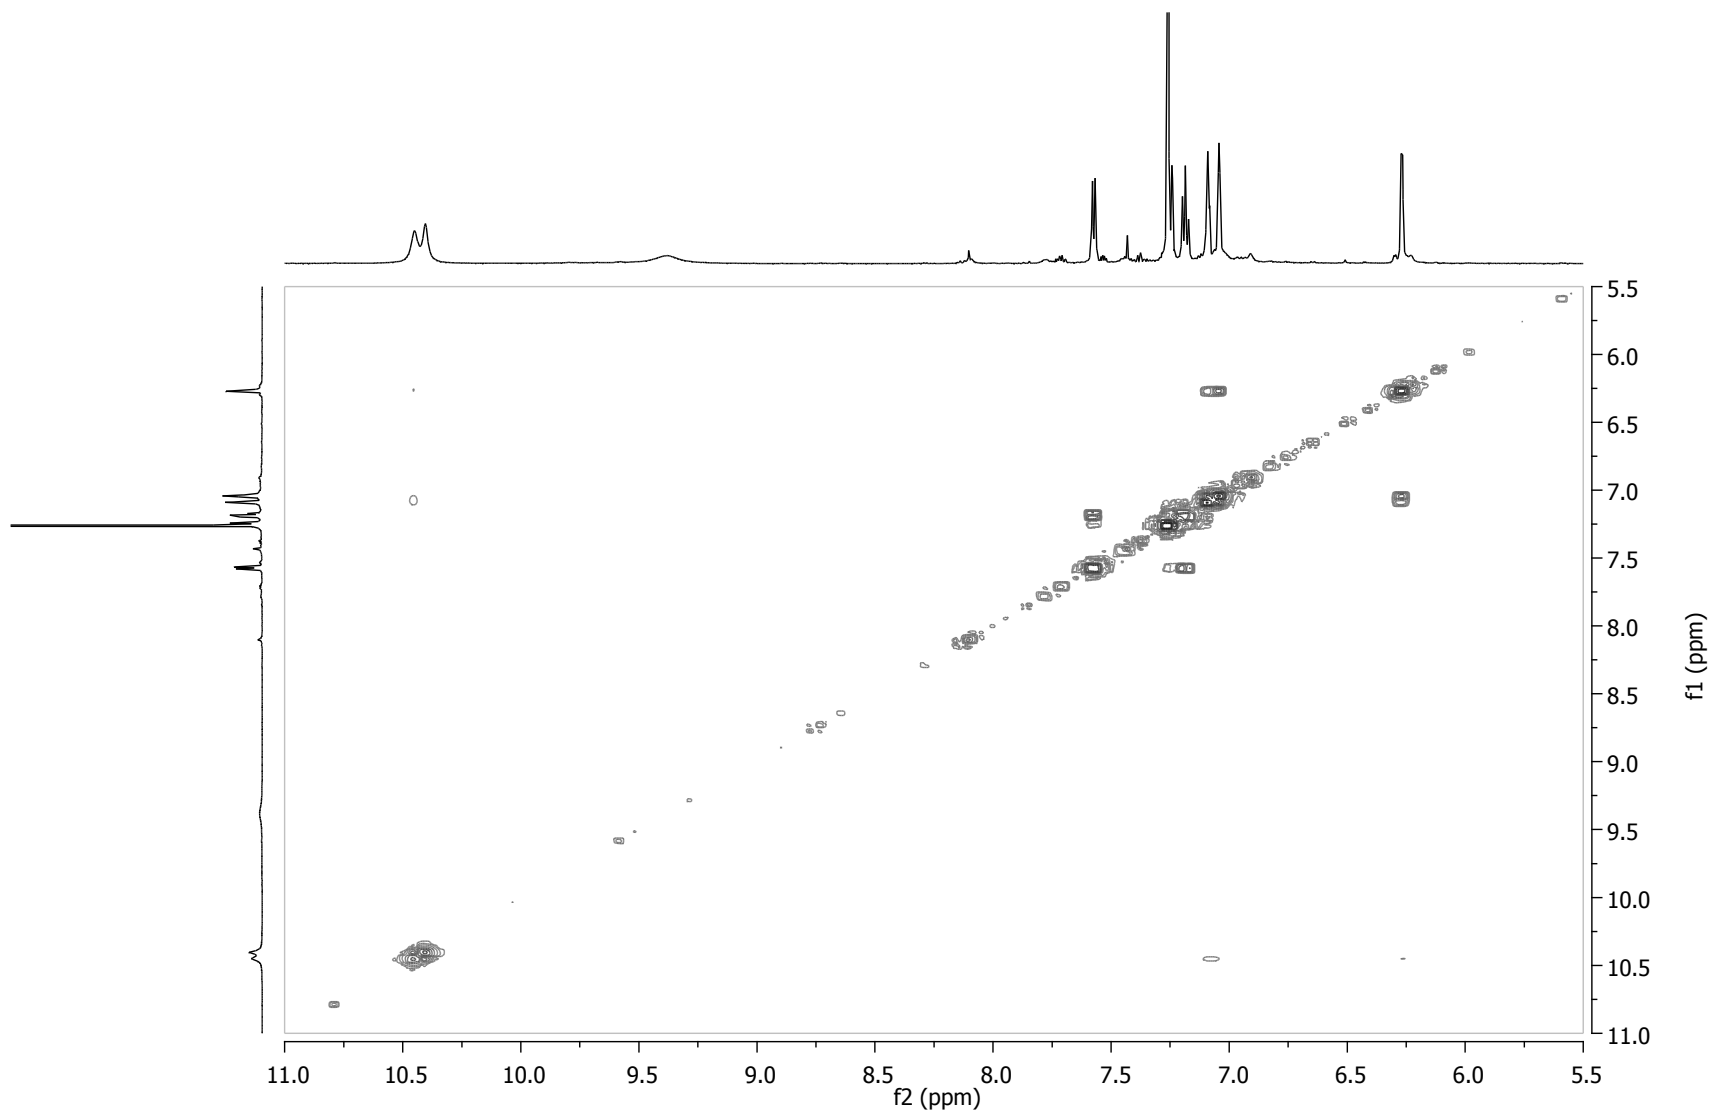

Figure S15: COSY spectrum (5.5-11.0 ppm) of deoxacalcimycin.



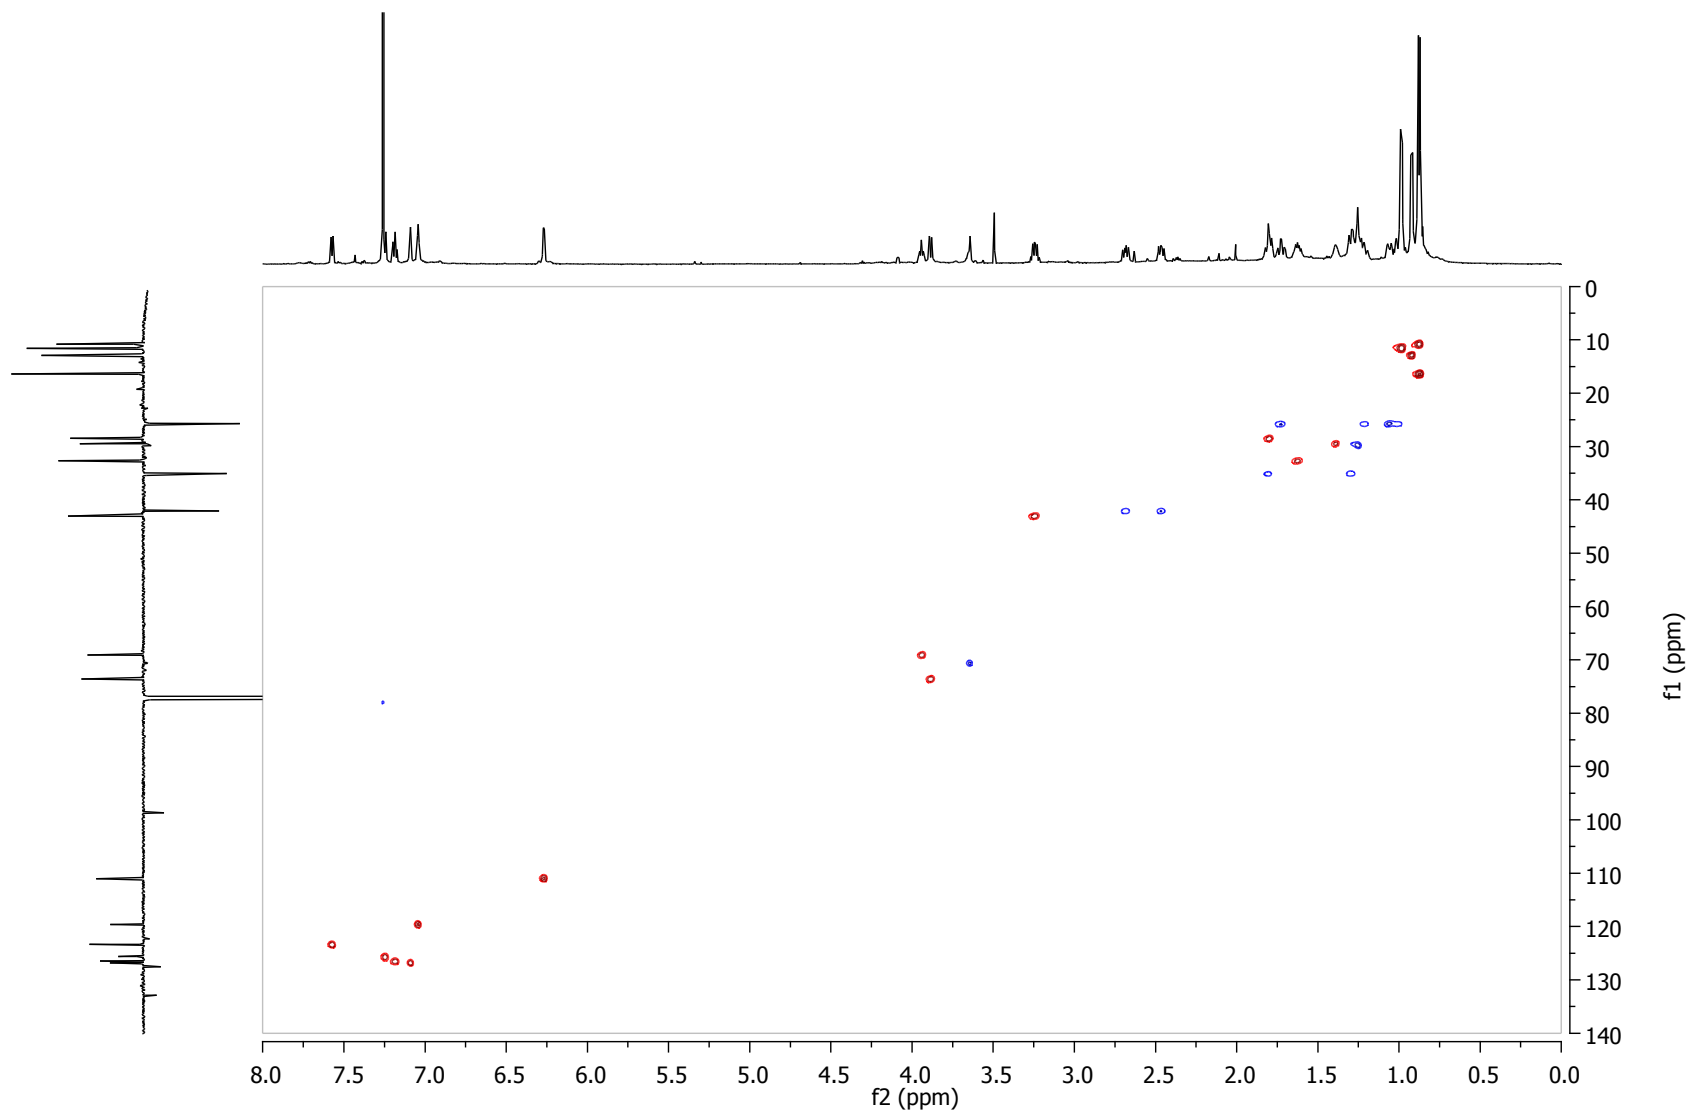

Figure S16: HSQC spectrum of deoxacalcimycin.

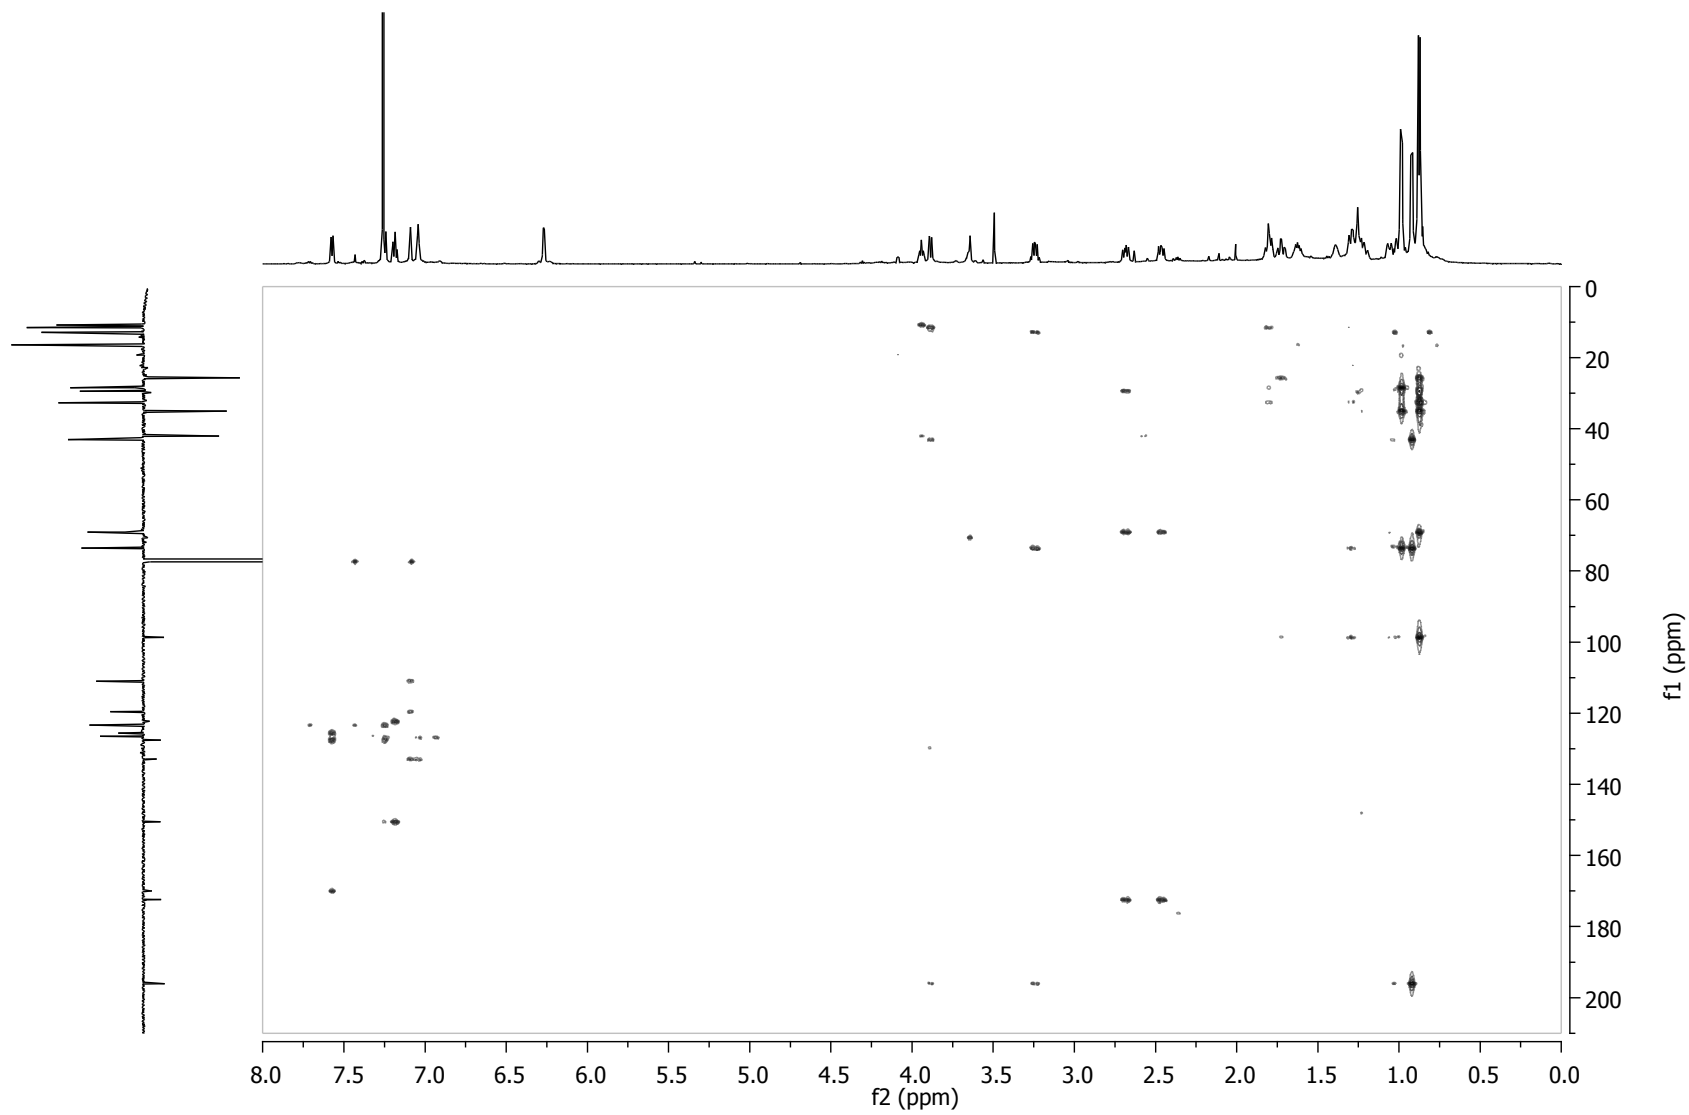

Figure S17: HMBC spectrum of deoxacalcimycin.

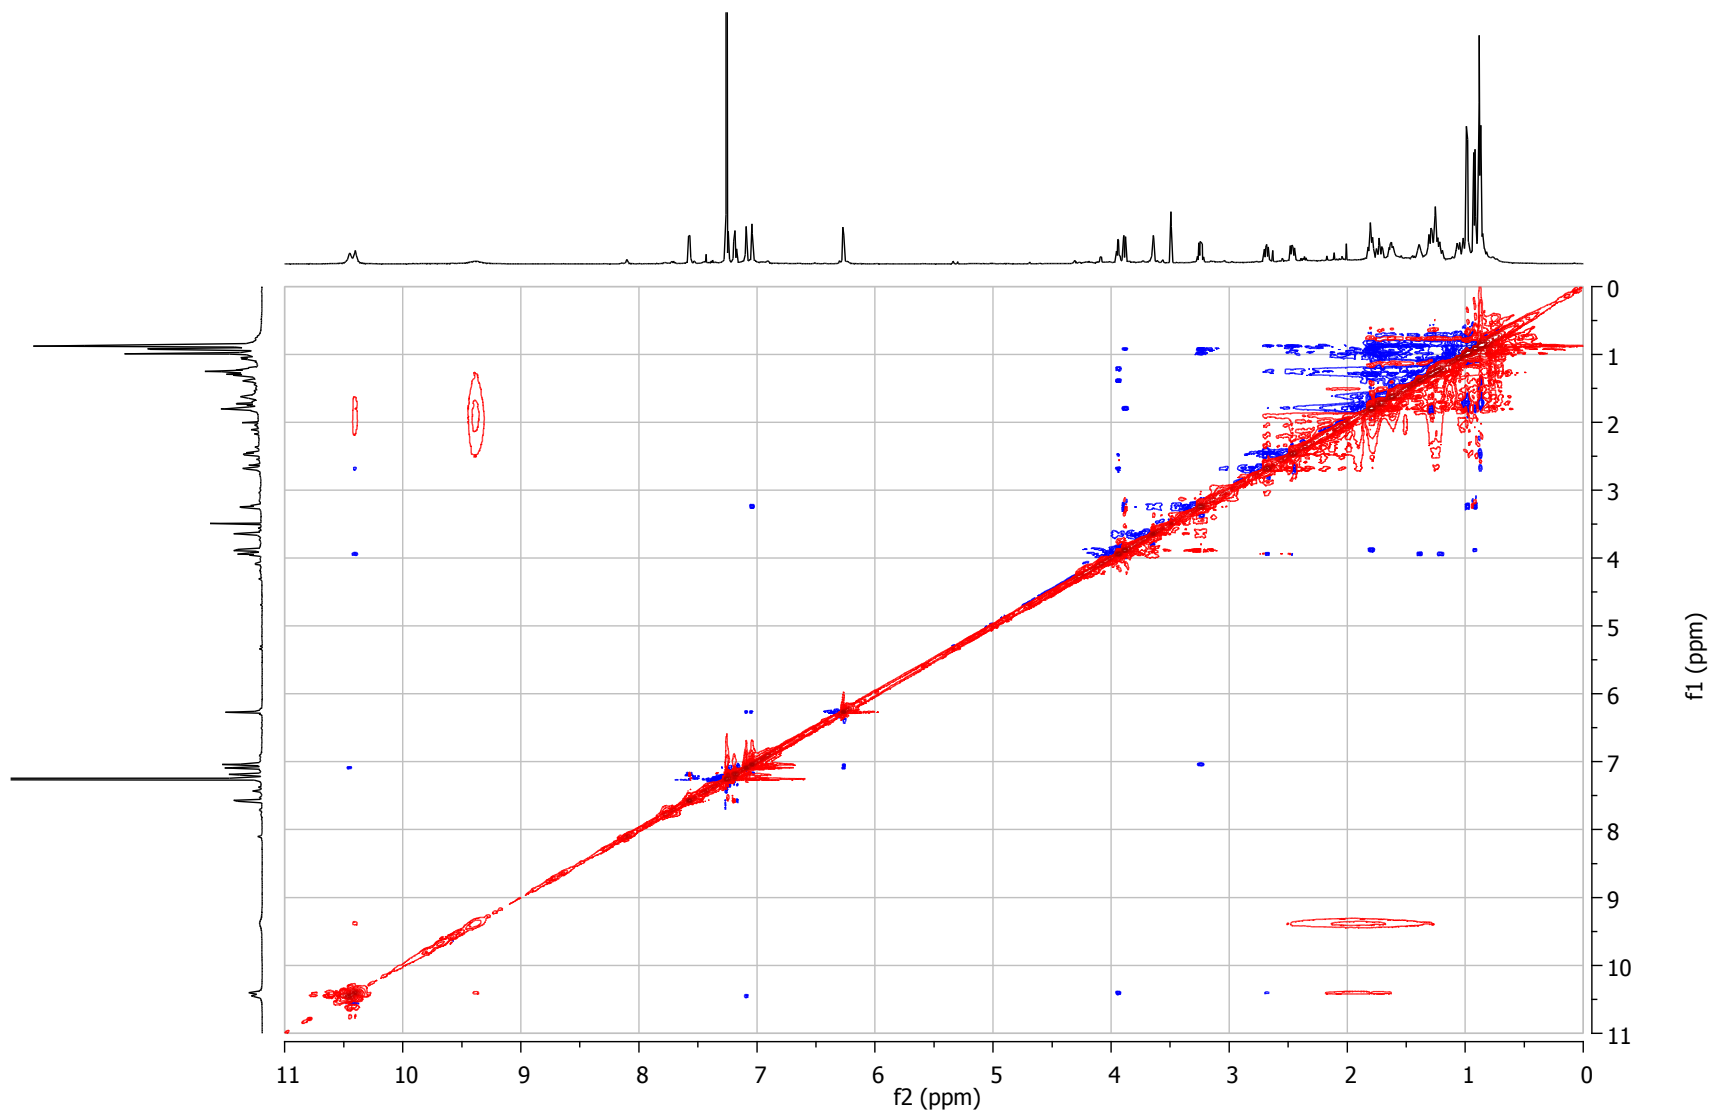

Figure S18: NOESY spectrum of deoxacalcimycin.

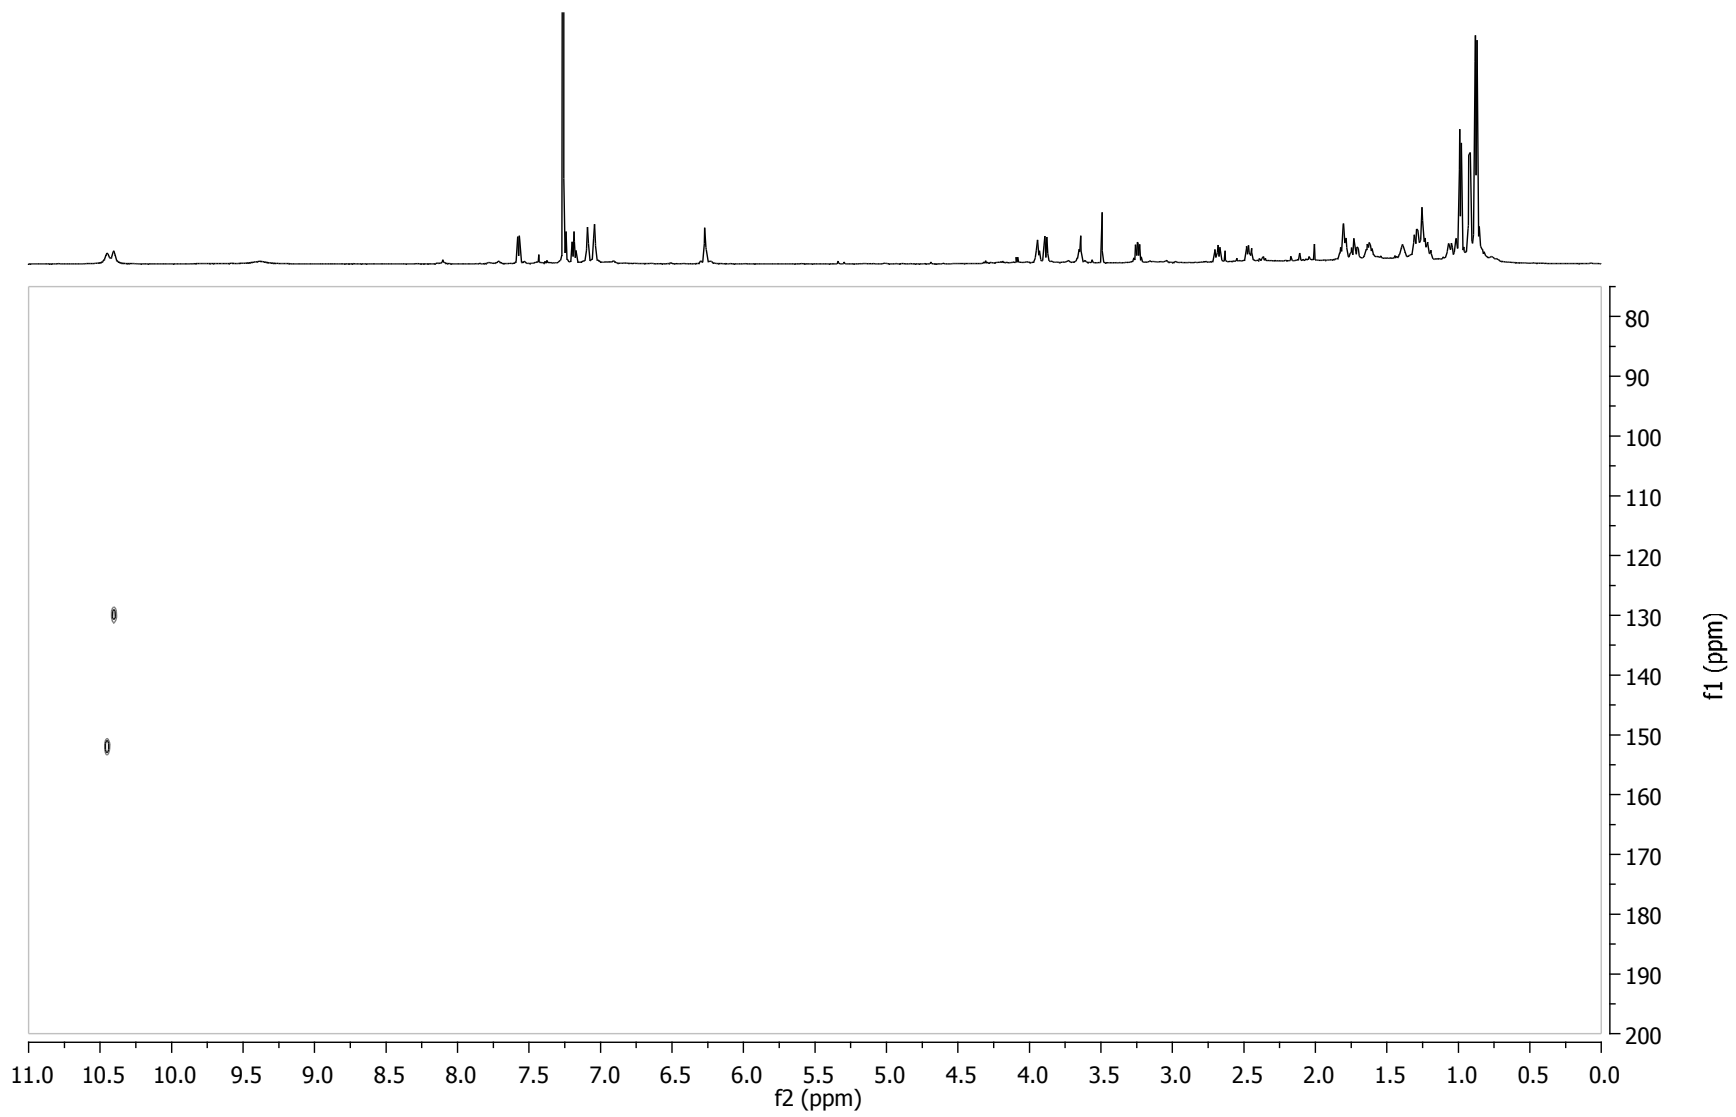

**Figure S19:**  $^1\text{H}/^{15}\text{N}$  HSQC spectrum of deoxacalcimycin.

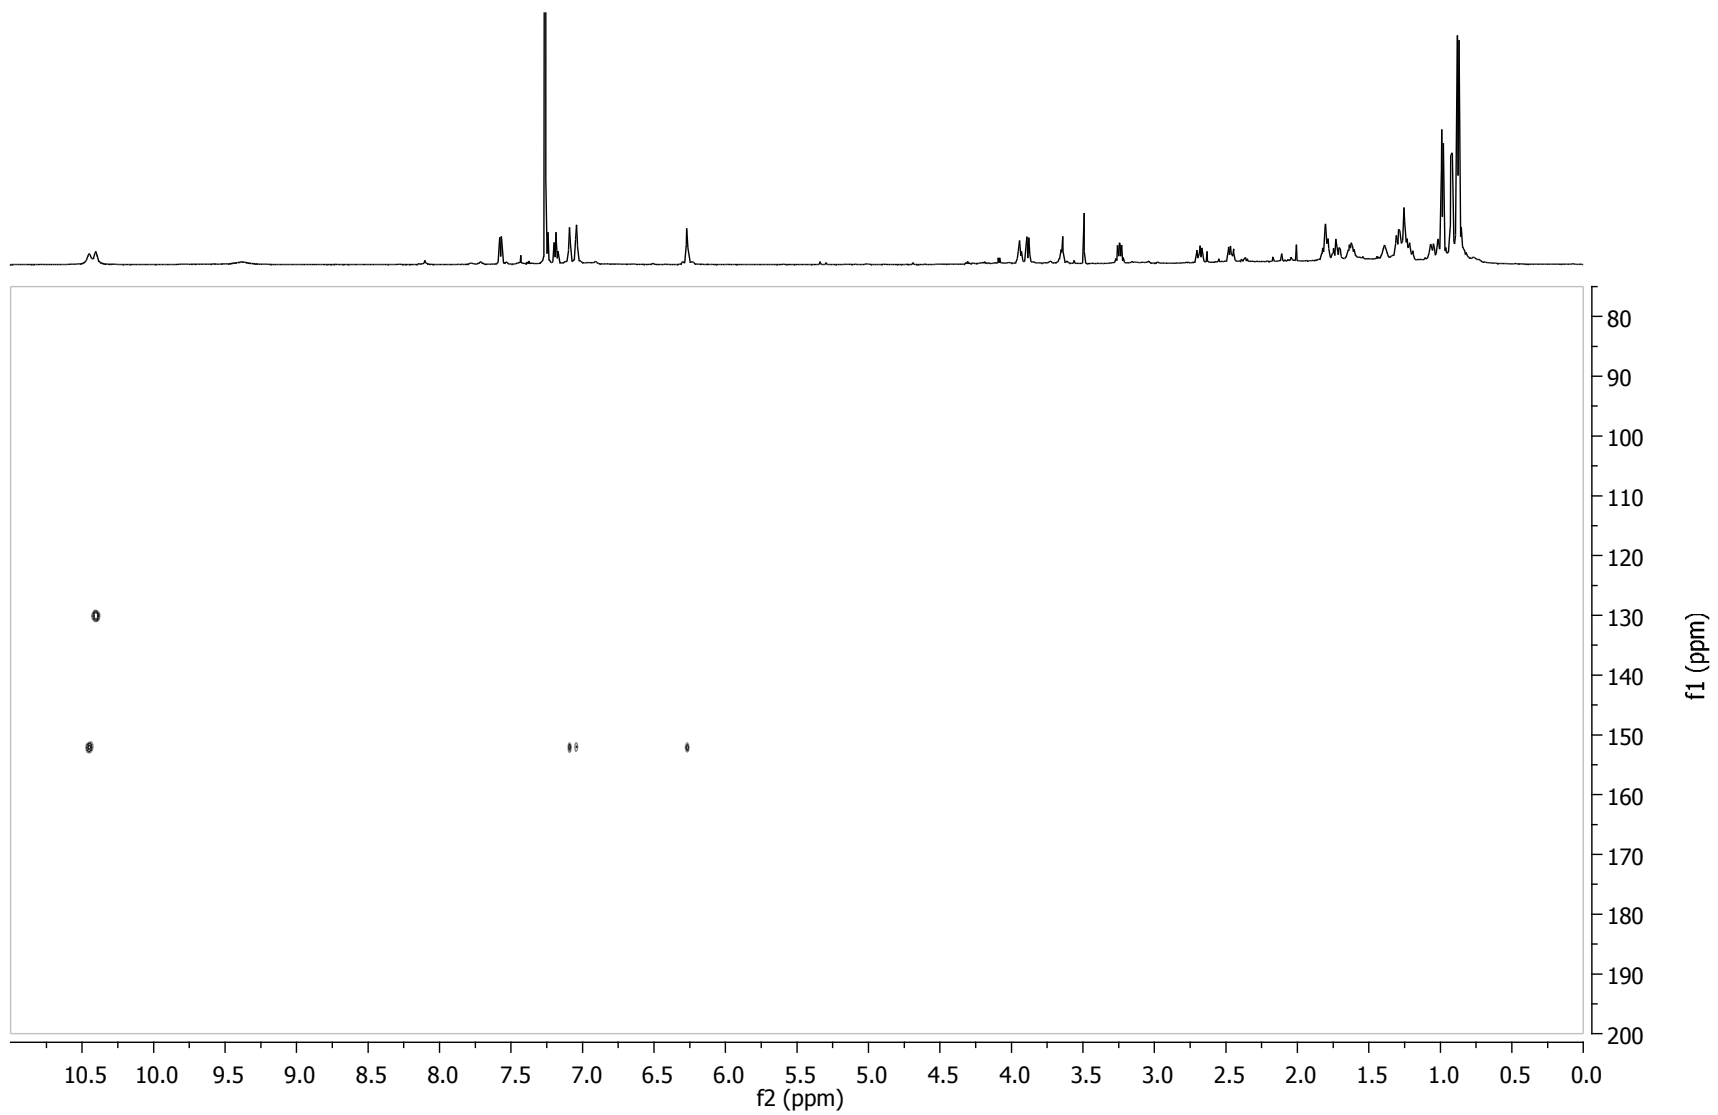

Figure S20:  $^1\text{H}/^{15}\text{N}$  TOCSY-HSQC spectrum of deoxacalcimycin.

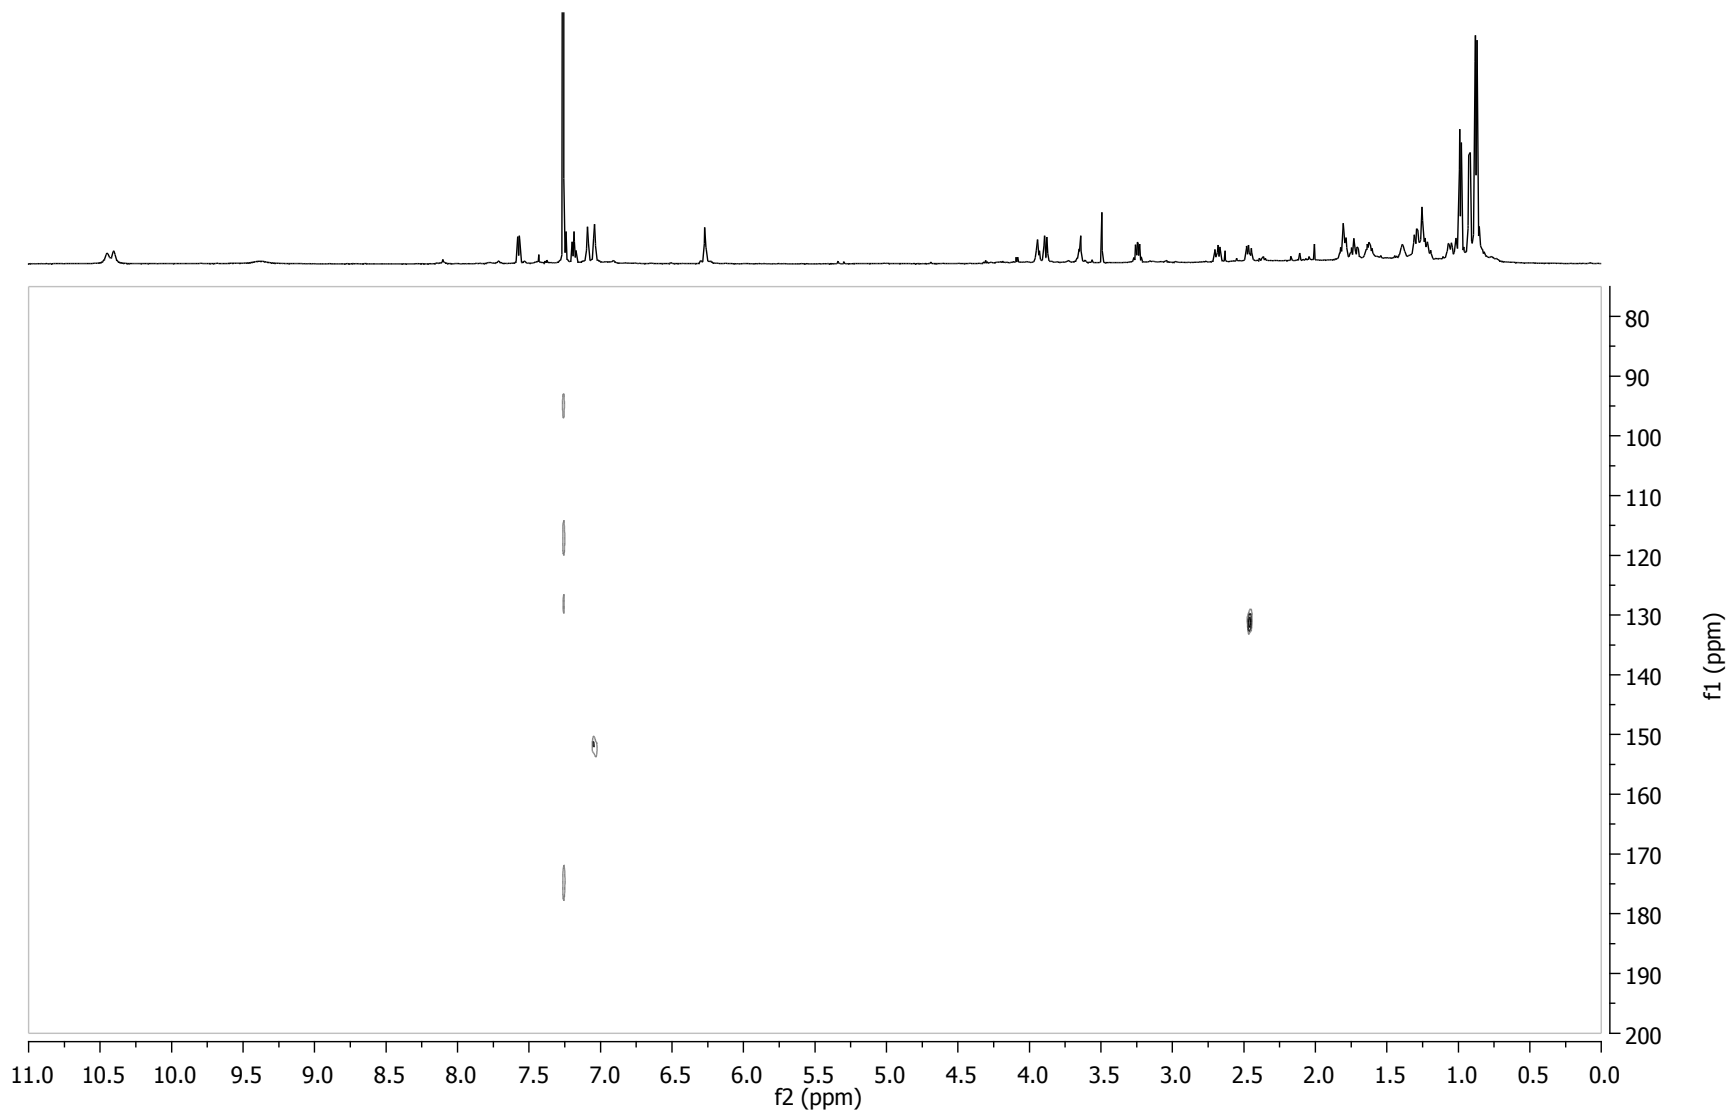

Figure S21:  $^1\text{H}/^{15}\text{N}$  HMBC spectrum of deoxacalcimycin.

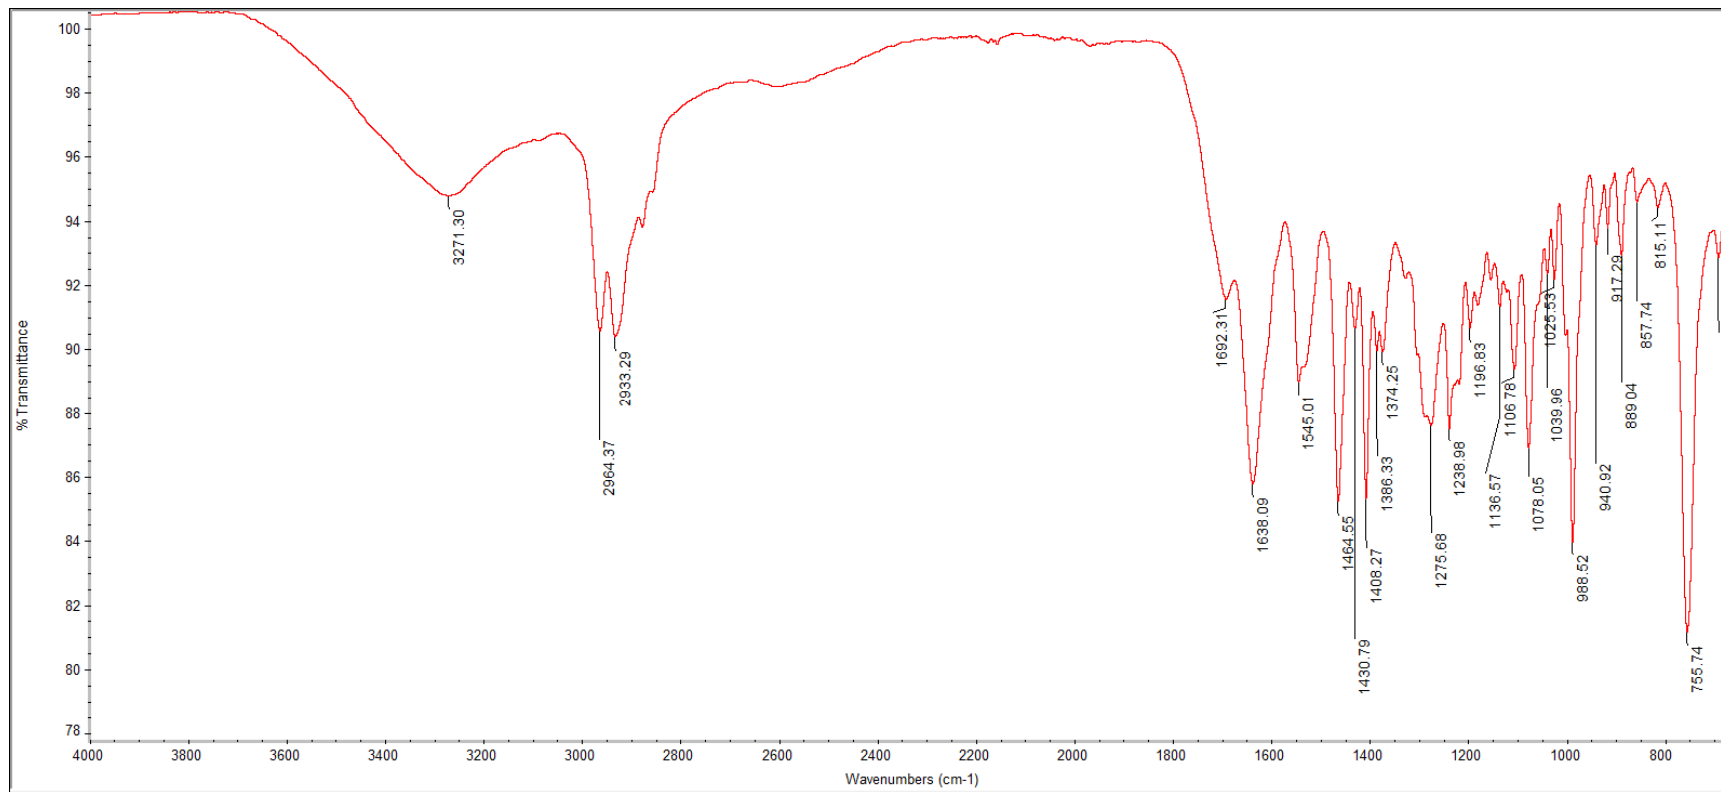

Figure S22: FTIR spectrum of deoxacalcimycin.

CS\_C3\_10ugperml\_1\_fa #85-222 RT: 0.69-1.84 AV: 138 NL: 5.97E6  
 T: FTMS + p ESI Full ms2 513.26@cid30.00 [140.00-2000.00]

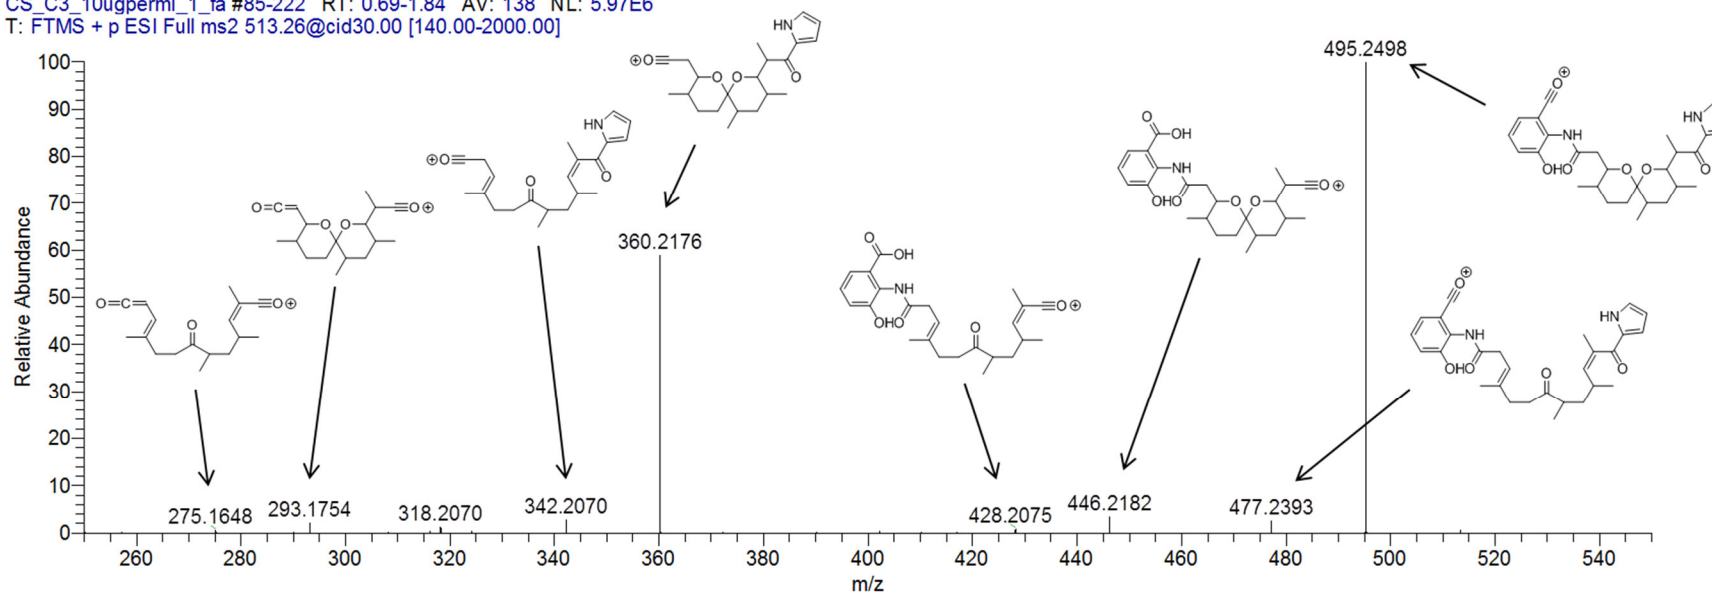

Figure S23: ESI-MS/MS spectrum of purified deoxacalcimycin and annotation of detected fragments.

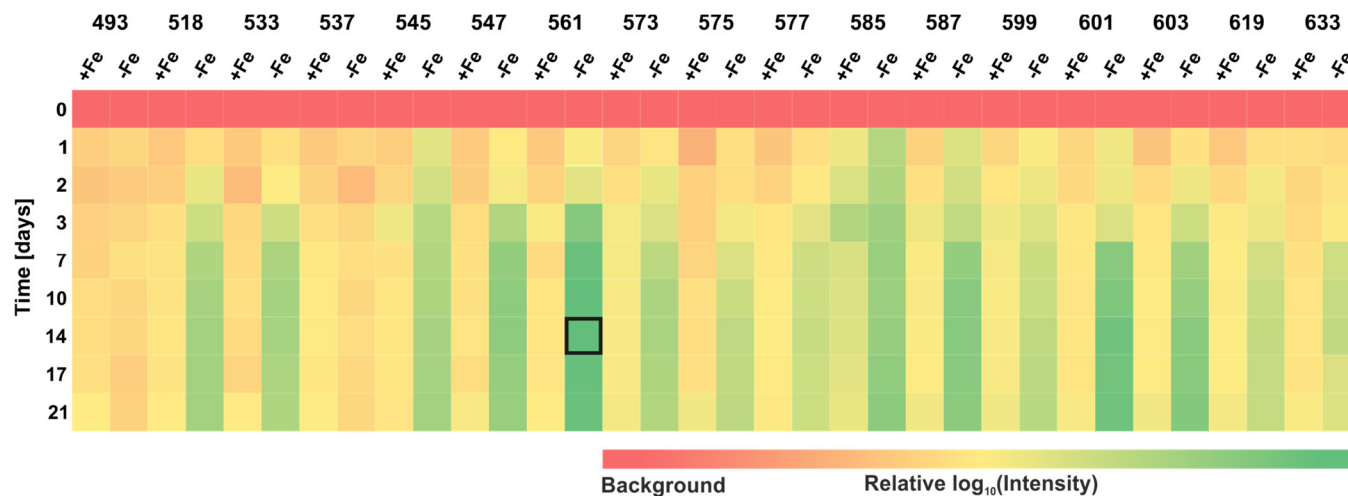

Figure S24: Siderophore production in minimal media. Given are the average  $\log_{10}$  intensities of desferrioxamine siderophores (indicated by  $[M+H]^+$ ) detected in three biological replicates of *S. chartreus* cultivation in minimal medium with (+Fe) and without iron (-Fe). Intensities are related to the most intense signal (black frame). Further information on siderophore identity is provided in Tab. S2, Fig. 3, and Fig. S6.



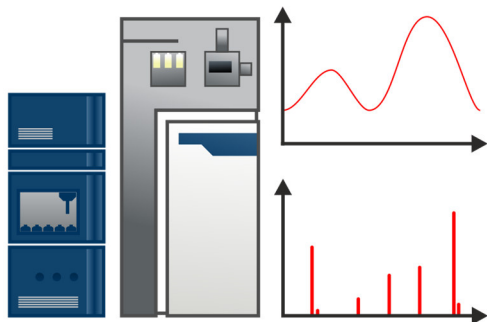

### 1. Collecting data.

By LC-MS/MS, for every detected compound information on the polarity (retention time), molecular formula (parent mass), and molecular structure (fragment spectrum) is gathered.

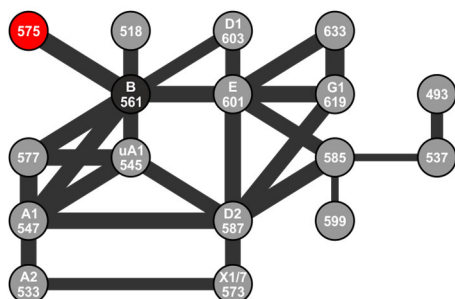

### 2. Generation of a molecular network.

Using the Global Natural Products Social Molecular Networking-platform ([gnps.ucsd.edu](http://gnps.ucsd.edu)) a molecular network based on the fragmentation spectra is generated. Compounds, represented by nodes in the network, are sorted based on the similarity of their fragmentation spectra. Nodes representing highly similar spectra are connected by edges and are likely to be structurally similar.

### 3. Annotation of fragment spectra for known compounds.

For identified compounds with known structures (B 561; black in 2.), for example identified by library searches or by comparison to standards, the signals in the fragment spectrum are assigned to the corresponding molecular fragments. This step can be aided by utilizing *in silico* fragmentation tools like MetFrag ([msbi.ipb-halle.de/MetFrag/](http://msbi.ipb-halle.de/MetFrag/)).

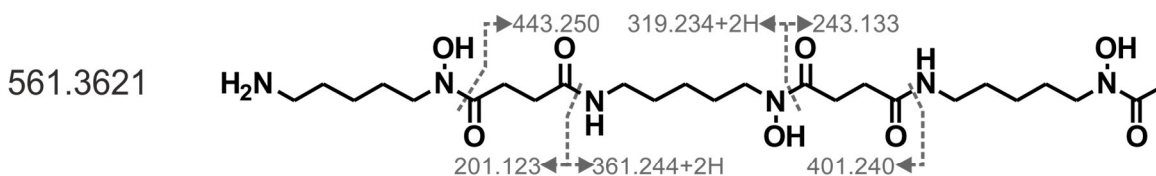

| Formula                 | Monoisotopic Mass | $\Delta$ ppm |
|-------------------------|-------------------|--------------|
| $C_{26}H_{51}N_6O_8$    | 575.3763          | 0.2          |
| $C_{25}H_{55}N_2O_{12}$ | 575.3750          | 2.2          |
| $C_{23}H_{42}N_{16}O_2$ | 575.3749          | 2.2          |
| $C_{38}H_{46}N_4O$      | 575.3744          | 3.1          |
| $C_{22}H_{46}N_{12}O_6$ | 575.3736          | 4.5          |

### 4. Prediction of the molecular formula.

Based on the parent mass the molecular formula of novel compounds (575; red in 2.) is predicted with tools like mMass ([mmass.org](http://mmass.org)). Through comparison with known derivatives, identified by molecular networking, the number of candidate formulae can be reduced by exclusion of unlikely compositions.

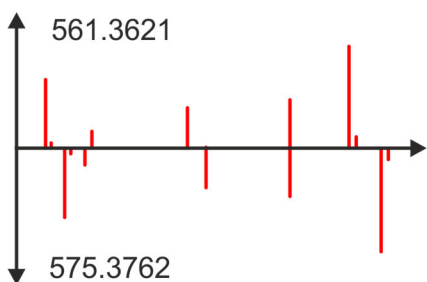

### 5. Comparison of fragment spectra.

Through comparison with annotated spectra of known compounds common molecular substructures as well as differences can be identified.

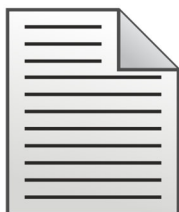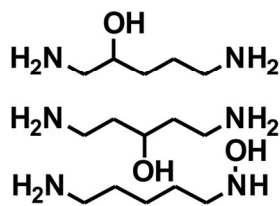

### 6. Structure prediction

Utilizing the molecular formulae and the information on common and unique fragments, a library of molecular structures is generated containing all possible variants of the candidate compound. Fragments are assigned to identify the structure. This process can again be aided by *in silico* fragmentation tools like MetFrag.

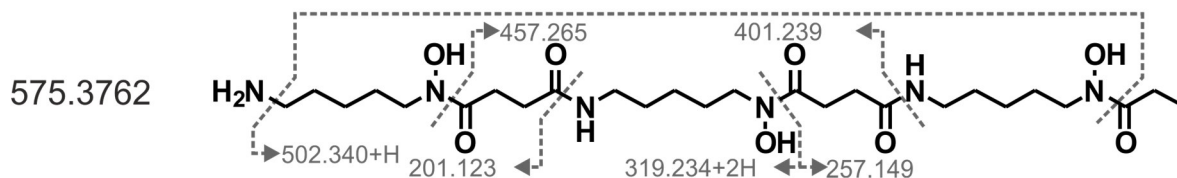

**Figure S25: Basic workflow for networking-guided structure elucidation via tandem mass spectrometry.** Desferrioxamine B (561) and desferrioxamine 575 serve as examples for the identification of known compounds and structural annotation of new compounds, respectively.

## Methods

**Strains and cultivation conditions.** *Streptomyces chartreusis* NRRL 3882 was grown in YEME complex medium (CM), containing 3 g/l yeast extract, 5 g/l peptone, 3 g/l malt extract, 55.5 mM glucose, and 73 mM saccharose (10). NCBMM was used as a defined minimal medium (MM). NCBMM is a modified variant of Belitzky minimal medium (11) in which trisodium citrate was replaced by 21 mM NaCl, also containing 15 mM (NH<sub>4</sub>)<sub>2</sub>SO<sub>4</sub>, 8 mM MgSO<sub>4</sub>, 27 mM KCl, 50 mM Tris, 0.6 mM KH<sub>2</sub>PO<sub>4</sub>, 2 mM CaCl<sub>2</sub>, 0.01 mM MnSO<sub>4</sub>, 4.5 mM L-glutamate, 0.78 mM L-tryptophan, and 11 mM D-glucose. The pH was adjusted to 7.5 using HCl. Iron was added/omitted as 0.001 mM FeSO<sub>4</sub> when necessary. For compound purification ISP2 medium was used, containing 4 g/l yeast extract, 10 g/l malt extract, and 4 g/l glucose (12). *S. chartreusis* NRRL 3882 was cultivated at 30 °C and 180 rpm in an Innova orbital shaker.

**DNA isolation and sequencing.** DNA of *S. chartreusis* NRRL 3882 was isolated as described in Schwientek *et al.*, 2011 and Kieser *et al.*, 2000 (10, 13). In brief, *S. chartreusis* NRRL 3882 was cultivated in 10 ml YEME with 0.5% glycin for 48 h. Mycelia were harvested in 2 ml aliquots and washed in 500 µl 10% sucrose and subsequently 500 µl TE buffer (10 mM Tris, 5 mM EDTA, pH 8). Cells were disrupted in 300 µl TE buffer with 5 mg/ml lysozyme and 0.075 mg/ml pre-boiled RNase A at 37 °C for 2 h. Afterwards 50 µl 5 M NaCl and 120 µl 10% SDS were added, the samples were boiled and 240 µl 5 M ice-cold potassium acetate was added prior to incubation at -20 °C. The DNA was pelleted with 600 µl ice-cold isopropanol, washed in 500 µl 70% ethanol, and solved in 30 µl of sterile H<sub>2</sub>O. Final DNA concentrations were about 3800 ng/µl. In order to avoid problems with GC-rich regions, a whole-genome-shotgun PCRfree library (Nextera DNA Sample Prep Kit; Illumina, Munich, Germany) was generated for *S. chartreusis* NRRL 3882 based on the manufacturer's protocol. The resulting library was sequenced on the Illumina MiSeq platform. After sequencing and raw data processing with an in-house platform (14), a *de novo* assembly was obtained by applying the gsAssembler 2.8 (Roche) with default settings. For the annotation of the genome, the platforms Prokka 1.11 (15) and GenDB 2.0 (16) were applied.

**AntiSMASH analysis.** The complete genome was analyzed using the antibiotics & Secondary Metabolite Analysis Shell (antiSMASH version 3.0.5 (17)) with default settings.

**Hydrophobic interaction chromatography.** After 14 days of cultivation the culture supernatant of a 100 ml NCBMM-Fe culture was incubated with 25 mg/ml of Diaion HP-20 resin (Sigma-Aldrich) for three hours (18). The resin was washed with water and poured into a column. Elution was performed using three column volumes with 25%, 50%, and 100% CH<sub>3</sub>OH subsequently.

**LC-coupled MS/MS-measurements.** Experiments were performed in three biological replicates. *S. chartreusis* was cultivated for 14 days in YEME and NCBMM+/-Fe. Culture supernatant was harvested after 0, 1, 3, 7, and 14 days. The supernatant (400 µl) was extracted with 1320 µl ethyl acetate. The aqueous phase was washed twice with 200 µl ethyl acetate and the organic phase with 200 µl water. Organic and aqueous phase were reduced *in vacuo* and reconstituted in 100 µl MS-grade CH<sub>3</sub>OH.

Separation was performed by using a nanoACQUITY-UPLC system (Waters) with a Mixer Assy (Waters, zirc bead, inner cross section 1mm, length 50 mm) and an AcquityUPLC CSH C18 column (Waters, pore size 130 Å, particle size 1.7 µm, inner cross section dimension 1 mm, length 100 mm) and a H<sub>2</sub>O/acetonitrile gradient with 0.1% formic acid (FA). The flow rate was 5 µl/min. The following gradient was used.

## Gradient for LC-MS/MS

| Time [min] | % ACN with 0.1% FA |
|------------|--------------------|
| Initial    | 5.0                |
| 5          | 5.0                |
| 18         | 99.5               |
| 29         | 99.5               |
| 37         | 5.0                |
| 45         | 5.0                |

Data-dependent mass measurements were performed with a Synapt G2-S HDMS (Waters), with an ESI source and a TOF detector, in positive resolution mode. Masses in a range of 50 to 3000  $m/z$  were detected with 0.5 s per scan and leucine enkephalin being injected as a reference mass every 30 s. Used parameters: lockspray capillary current 2.5 kV, capillary current 2.5 kV, cone voltage 30 V, source temperature 120 °C, cone gas flow 60 l/h, flushing gas flow 550 l/h, with a temperature of 150 °C. Fragmentation in MS/MS mode was conducted via collision-induced dissociation (CID) with argon and a collision energy of 10-25 V. Fragmentation was started when the intensity of a mass exceeded 6000 counts/s and was finished after 6 s at max. Fragmentation was stopped prematurely if the intensity fell below 6000 counts/s.

**LC-coupled MS<sup>E</sup> measurements.** Experiments were performed in three biological replicates. Data-independent measurements were performed as described in the LC-MS/MS section with the modification that data was acquired in continuous MS<sup>E</sup> mode and the collision energy was 14-45 V.

**Molecular networking and spectra annotation.** Fragmentation spectra were converted from waters .raw to .mzXML using Proteowizard (ver. 3.0.9490), with 32-bit binary encoding precision and peak picking. Spectra were uploaded to the UCSD GNPS FTP-server [ucsd.gnps.edu] and investigated via the METBOLOMICS-SNETS (19) workflow with following parameters: parent mass tolerance 2 Da, ion tolerance 0.5 Da, minimal pairs cos 0.7, network topK 10, maximum connected component size 100, minimum matched peaks 6, minimum cluster size 2, run MSCluster. Data were visualized via Cytoscape (ver. 3.3.0). Redundancies and adducts were cleared manually. Network nodes corresponding to the uninoculated media or solvent background, as well as nodes with less than three fragment spectra were excluded.

Metabolites were identified through comparison with standards, searching the GNPS database and through manual annotation of fragment spectra by generating candidate structures in ChemBioDraw Ultra (PerkinElmer, ver. 13.0.2.30.21). Files were uploaded to MetFrag and subjected to *in silico* fragmentation (20).

**Colorimetric siderophore detection.** A chromeazurol S (CAS) assay, as described by Schwyn and Neilands in 1986 was used (21). In brief, cell free culture supernatant was mixed in equal amounts with the reaction solution (15  $\mu$ M FeCl<sub>3</sub>, 150  $\mu$ M CAS, 600  $\mu$ M cetyl trimethylammonium bromide, 563 mM piperazin, pH 5.6). After 3 hours of equilibration the absorption at 660 nm was measured. Experiments were performed in five biological replicates.

**Compound purification and characterization.** All commercially available solvents and reagents were used without further purification. Deionized water was purified to 18.2 M $\Omega$ ·cm on a Milli-Q Biocel water purification system (EMD Millipore). Deoxacalcimycin was obtained, along with known compounds calcimycin and cezomycin, from crude extract of *Streptomyces chartreusis* NRRL3882 cultivated in ISP2. The mycelial cake was removed by centrifugation and the supernatant of a 12 l culture was extracted with equal amounts of ethyl acetate. The organic extract was evaporated to dryness and the remaining residue was dissolved in CH<sub>3</sub>OH to give 10 mg/ml. Automated reversed-phase medium pressure liquid chromatography (RP-MPLC) was performed on a CombiFlash Rf (Teledyne Isco) using a 40 g SiliaSep™

C<sub>18</sub> column (40-63  $\mu\text{m}$ , 60  $\text{\AA}$ , Silicycle). The following H<sub>2</sub>O/acetonitrile gradient with 0.1% FA with a flow rate of 40 ml/min was used for flash chromatography, while calcimycin-like compounds were detected at 360 nm.

#### Gradient for flash chromatography

| Time [min] | % ACN with 0.1% FA |
|------------|--------------------|
| Initial    | 4.8                |
| 3          | 4.8                |
| 25         | 99.5               |
| 40         | 99.5               |

Peak fractions were combined, dried and subjected to further analysis. Ultra-performance liquid chromatography–high-resolution mass spectrometry (UPLC-HRMS) was performed using an Exactive Orbitrap mass spectrometer (Thermo Fisher Scientific) equipped with an Accella PDA (Thermo Fisher Scientific) and a SEDEX Model 80 LT-ELSD detector (Sedere). The UPLC was equipped with a Core Shell Kinetex C<sub>18</sub> column (2.1  $\times$  50 mm, 1.7  $\mu\text{m}$ , Phenomenex). The gradient program involved a linear gradient at a flow rate of 500  $\mu\text{l}/\text{min}$  from 95 % H<sub>2</sub>O (0,1% FA) at 0.2 min to 100 % CH<sub>3</sub>CN (0.1% FA) at 4.8 min, which was held for 3.2 min. The final amount of pure deoxacalcimycin was 2.94 mg.

All <sup>1</sup>H and <sup>13</sup>C NMR spectra were acquired on a 600 MHz Bruker Avance III NMR spectrometer (Billerica) operating at 600 and 150 MHz, respectively. All chemical shifts are reported in  $\delta$  units and are referenced to the residual solvent signal of CDCl<sub>3</sub> ( $\delta_{\text{H}}$  7.26 ppm and  $\delta_{\text{C}}$  77.16 ppm). Coupling constants are reported in Hz with the following abbreviations: (s) singlet, (d) doublet, (t) triplet, (q) quartet, (m) multiplet, (br) broad, (app.) apparent. Optical rotations were recorded on an Autopol III polarimeter (Rudolph Research Analytical). Infrared spectra were acquired by attenuated total reflectance using a SMART iTR™ accessory on a Nicolet™ 6700 FTIR spectrometer (Thermo Fisher Scientific).

## References

1. Wu Q, Liang J, Lin S, Zhou X, Bai L, Deng Z, Wang Z (2010) Characterization of the biosynthesis gene cluster for the pyrrole polyether antibiotic calcimycin (A23187) in *Streptomyces chartreusis* NRRL 3882. *Antimicrob Agents Chemother* 55(3):974-982.
2. Wu Q, Gou L, Lin S, Liang J, Yin J, Zhou X, Bai L, An D, Deng Z, Wang Z (2013) Characterization of the N-methyltransferase CalM involved in calcimycin biosynthesis by *Streptomyces chartreusis* NRRL 3882. *Biochimie* 95(7):1487-1493.
3. Barona-Gomez F, Wong U, Giannakopoulos AE, Derrick PJ, Challis GL (2004) Identification of a cluster of genes that directs desferrioxamine biosynthesis in *Streptomyces coelicolor* M145. *J Am Chem Soc* 126(50):16282-16283.
4. Feistner GJ, Stahl DC, Gabrik AH (1993) Proferrioxamine siderophores of *Erwinia amylovora*. A capillary liquid chromatographic/electrospray tandem mass spectrometric study. *J Mass Spectrom* 28(3):163-175.
5. Adapa S, Hubts P, Keller-Schierlein W (1982) Metabolites of microorganisms. 216 Isolation structure and synthesis of ferrioxamine H. *Helvetica Chimica Acta* 65(6):1818-1824.
6. Takahashi A, Nakamura H, Kameyama T, Kurasawa S, Naganawa H, Okami Y, Takeuchi T, Umezawa H, Iitaka Y (1987) Bisucaberin, a new siderophore, sensitizing tumor cells to macrophage-mediated cytotoxicity. II. Physicochemical properties and structure determination. *J Antibiot (Tokyo)* 40(12):1671-1676.
7. Telfer TJ, Gotsbacher MP, Soe CZ, Codd R (2016) Mixing up the pieces of the desferrioxamine B jigsaw defines the biosynthetic sequence catalyzed by DesD. *ACS Chem Biol* 11(5):1452-1462.
8. Challis GL, Ravel J (2000) Coelichelin, a new peptide siderophore encoded by the *Streptomyces coelicolor* genome: structure prediction from the sequence of its non-ribosomal peptide synthetase. *FEMS Microbiol Lett* 187(2):111-114.
9. Deitz WH, Bailey JH, Froelich EJ (1963) *In vitro* antibacterial properties of nalidixic acid, a new drug active against gram-negative organisms. *Antimicrob Agents Chemother* (Bethesda) 161:583-587.
10. Kieser T, Bibb MJ, Buttner MJ, Chater KF, Hopwood DA (2000) Practical *Streptomyces* genetics. (John Innes Foundation, Norwich) 412.
11. Stülke J, Hanschke R, Hecker M (1993) Temporal activation of beta-glucanase synthesis in *Bacillus subtilis* is mediated by the GTP pool. *J Gen Microbiol* 139(9):2041-2045.
12. Shirling EB, Gottlieb D (1966) Methods for characterization of *Streptomyces* species. *Int J Syst Bacteriol* 16:313-340.
13. Schwientek P, Szczepanowski R, Rückert C, Stoye J, Pühler A (2011) Sequencing of high G+C microbial genomes using the ultrafast pyrosequencing technology. *J Biotechnol* 155(1):68-77.
14. Wibberg D, Al-Dilaimi A, Busche T, Wedderhoff I, Schrempf H, Kalinowski J, Ortiz de Orué Lucana D (2016) Complete genome sequence of *Streptomyces reticuli*, an efficient degrader of crystalline cellulose. *J Biotechnol* 222:11-12.
15. Seemann T (2014) Prokka: Rapid prokaryotic genome annotation. *Bioinformatics* 30(14):2068-2069.
16. Meyer F, Goesmann A, McHardy AC, Bartels D, Bekel T, Clausen J, Kalinowski J, Linke B, Rupp O, Giegerich R, Pühler A (2003) GenDB-an open source genome annotation system for prokaryote genomes. *Nucleic Acids Res* 31(8):2187-2195.
17. Weber T, Blin K, Duddela S, Krug D, Kim HU, Brucoleri R, Lee SY, Fischbach MA, Müller R, Wohlleben W, Breitling R, Takano E, Medema MH (2015) antiSMASH 3.0-a comprehensive resource for the genome mining of biosynthetic gene clusters. *Nucleic Acids Res* 43(W1):W237-W243.
18. Han AW, Sany M, Fishman B, Trindade-Silva AE, Soares CA, Distel DL, Butler A, Haygood MG (2013) Turnerbactin, a novel tricatechololate siderophore from the shipworm endosymbiont *Teredinibacter turnerae* T7901. *Plos One* 8(19):e76151.
19. Wang M, Carver JJ, Phelan VV, Sanchez LM, Garg N, Peng Y, Nguyen DD, Watrous J, Kaponov CA, Luzzatto-Knaan T, Porto C, Bouslimani A, Melnik AV, Meehan MJ, Liu WT, Crüsemann M, Boudreau PD, Esquenazi E, Sandoval-Calderón M, Kersten RD, Pace LA, Quinn RA, Duncan KR, Hsu CC, Floros DJ, Gavilan RG, Kleigrewe K, Northen T, Dutton RJ, Parrot D, Carlson EE, Aigle B, Michelsen CF, Jelsbak L, Sohlenkamp C, Pevzner P, Edlund A, McLean J, Piel J, Murphy BT, Gerwick L, Liaw CC, Yang YL, Humpf HU, Maansson M, Keyzers RA, Sims AC, Johnson AR, Sidebottom AM, Sedio BE, Klitgaard A, Larson CB, Boya P CA, Torres-Mendoza D, Gonzalez DJ, Silva DB, Marques LM, Demarque DP, Pociute E, O'Neill EC, Briand E, Helfrich EJ, Granatosky EA, Glukhov E, Ryffel F, Houson H, Mohimani H, Kharbush JJ, Zeng Y, Vorholt JA, Kurita KL, Charusanti P, McPhail KL, Nielsen KF, Vuong L, Elfeki M, Traxler MF, Engene N, Koyama N, Vining OB, Baric R, Silva RR, Mascuch SJ, Tomasi S, Jenkins S, Macherla V, Hoffman T, Agarwal V, Williams PG, Dai J, Neupane R, Gurr J, Rodríguez AM, Lamsa A, Zhang C, Dorrestein K, Duggan BM, Almaliti J, Allard PM, Phapale P, Nothias LF, Alexandrov T, Litaudon M, Wolfender JL, Kyle JE, Metz TO, Peryea T, Nguyen DT, VanLeer D, Shinn P, Jadhav A, Müller R, Waters KM, Shi W, Liu X, Zhang L, Knight R, Jensen PR, Palsson BØ, Pogliano K, Lington RG, Gutiérrez M, Lopes NP, Gerwick WH, Moore BS, Dorrestein PC, Bandeira N (2016) Sharing and community curation of mass spectrometry data with Global Natural Products Social Molecular Networking. *Nat Biotechnol* 34(8):828-837.
20. Ruttkies C, Gehrlich M, Neumann S (2013) Tackling CASMI 2012: Solutions from MetFrag and MetFusion. *Metabolites* 3(3):623-636.
21. Schwyn B, Neilands JB (1987) Universal chemical assay for the detection and determination of siderophores. *Anal Biochem* 160(1):47-56.
